1 **Spatial organization of *Clostridium difficile* S-layer biogenesis**

2

3 Peter Oatley<sup>1†</sup>, Joseph A. Kirk<sup>1</sup>, Shuwen Ma<sup>2</sup>, Simon Jones<sup>2</sup>, Robert P. Fagan<sup>1†</sup>

4

5 <sup>1</sup> Florey Institute, Department of Molecular Biology and Biotechnology, University of

6 Sheffield, S10 2TN, UK

7 <sup>2</sup> Department of Chemistry, University of Sheffield, S3 7HF, UK

8 † To whom correspondence should be addressed: [p.oatley@sheffield.ac.uk](mailto:p.oatley@sheffield.ac.uk),

9 [r.fagan@sheffield.ac.uk](mailto:r.fagan@sheffield.ac.uk)

10

## 11 **Abstract**

12 Surface layers (S-layers) are protective protein coats which form around all archaea and most  
13 bacterial cells. *Clostridium difficile* is a Gram-positive bacterium with an S-layer covering its  
14 peptidoglycan cell wall. The S-layer in *C. difficile* is constructed mainly of S-layer protein A  
15 (SlpA), which is a key virulence factor and an absolute requirement for disease. S-layer  
16 biogenesis is a complex multi-step process, disruption of which has severe consequences for  
17 the bacterium. We examined the subcellular localization of SlpA secretion and S-layer growth;  
18 observing formation of S-layer at specific sites that coincide with cell wall synthesis, while the  
19 secretion of SlpA from the cell is relatively delocalized. We conclude that this delocalized  
20 secretion of SlpA leads to a pool of precursor in the cell wall which is available to repair  
21 openings in the S-layer formed during cell growth or following damage.

22

## 23 Introduction

24 *Clostridium difficile* infection (CDI) is the major cause of antibiotic associated diarrhoea (Hull  
25 & Beck, 2004) and can lead to severe inflammatory complications (Napolitano & Edmiston,  
26 2017). This Gram-positive bacterium has a cell wall encapsulating, proteinaceous surface-layer  
27 (S-layer), a paracrystalline array that acts as a protective semipermeable shell and is essential  
28 for virulence (Kirk et al., 2017). In *C. difficile* the S-layer consists mainly of SlpA, the most  
29 abundant surface protein (Calabi et al., 2001). SlpA is produced as a pre-protein (Figure 1A)  
30 that is secreted and processed by the cell wall cysteine protease Cwp84 into low molecular  
31 weight (LMW) and high molecular weight (HMW) SLP subunits (Kirby et al., 2009)(Figure  
32 1B). These two subunits form a heterodimeric complex that is then incorporated into the  
33 crystalline lattice of the S-layer, which is anchored to cell wall polysaccharide PS-II via three  
34 cell wall binding (CWB2) motifs within the HMW region (Fagan et al., 2009; Willing et al.,  
35 2015)(Figure 1A).

36 The production and secretion of S-layer components are energetically expensive for the cell,  
37 suggesting that the process will display evolved efficiency. However, it is not yet clear how S-  
38 layer formation is spatially regulated and whether SlpA is targeted to areas of cellular growth  
39 before or after secretion (Figure 1C). *C. difficile* express two homologs of the *E. coli* cytosolic  
40 protein export ATPase, SecA: SecA1 and SecA2 (Fagan & Fairweather, 2011). These two  
41 SecAs are thought to promote post-translational secretion through the general secretory (Sec)  
42 pathway. SecA2 is required for efficient SlpA secretion (Fagan & Fairweather, 2011) and is  
43 encoded adjacent to *slpA* on the chromosome (Monot et al., 2011). It has been shown that some  
44 SecA2 systems secrete specific substrates (reviewed by (Bensing, Seepersaud, Yen, & Sullam,  
45 2014)) which may ease the burden on the general Sec system and allow spatial or temporal  
46 regulation of secretion.

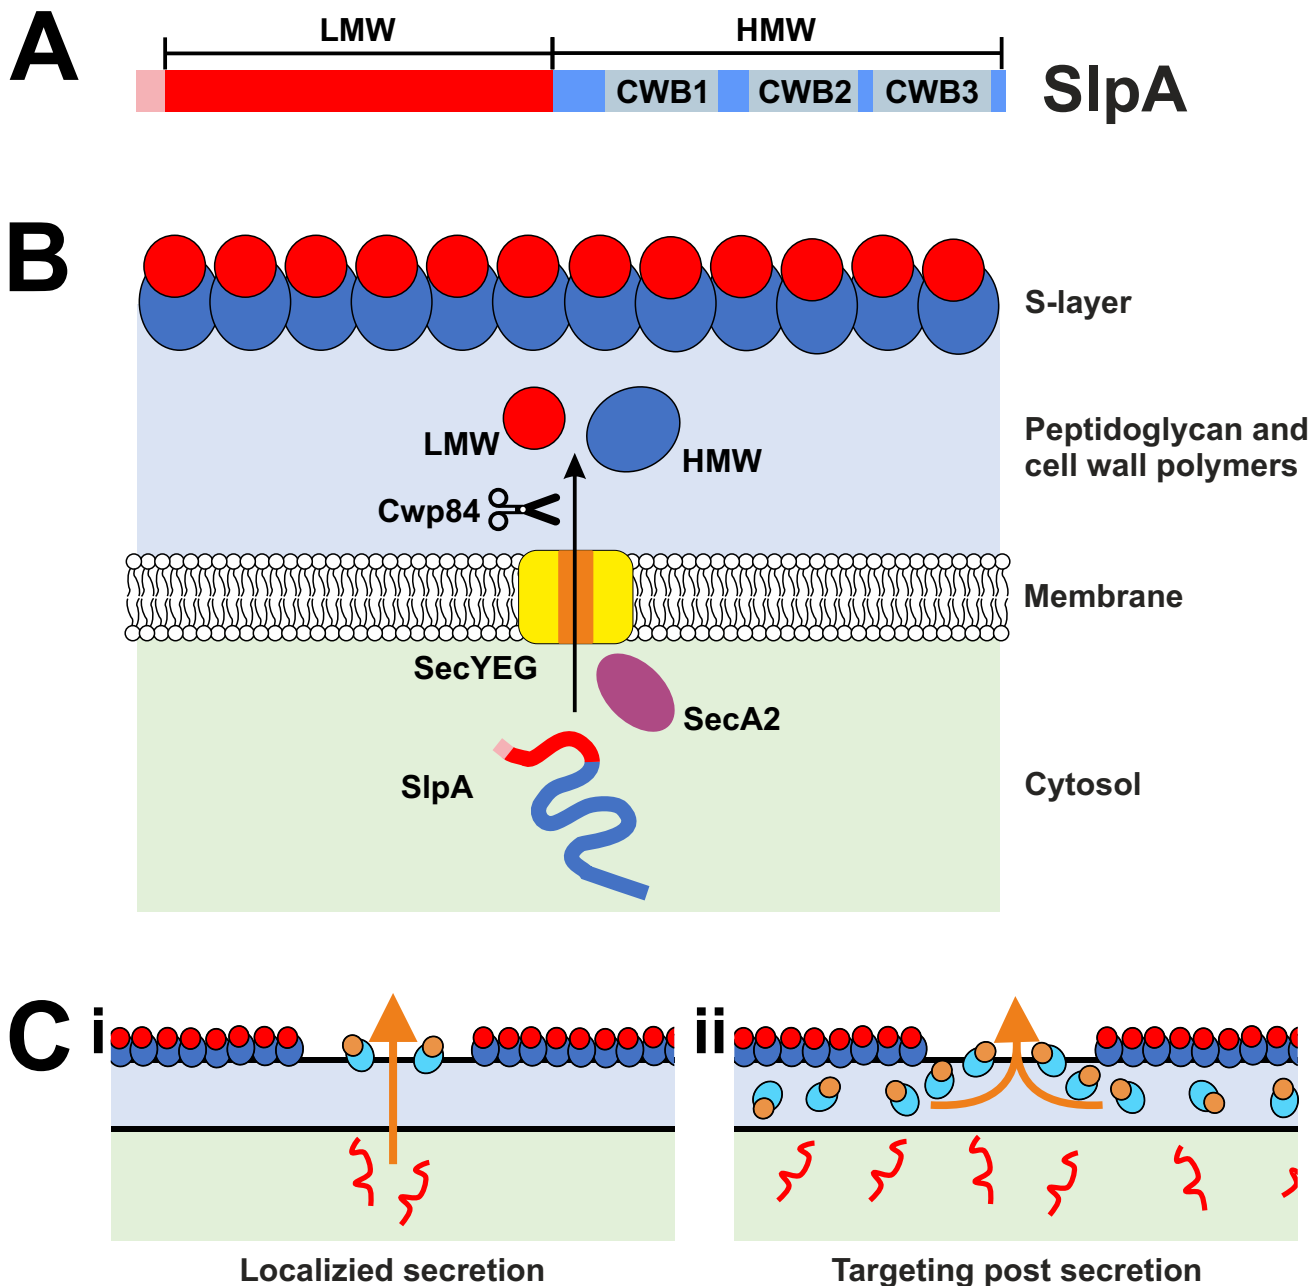

**Figure 1: The *C. difficile* S-layer and the SlpA secretory pathway.**

**A:** Domain structure of SlpA precursor protein with signal sequence (Pink), low molecular weight region (LMW, Red) and high molecular weight region (HMW, Blue) that contains three cell wall binding domains (CWB, 1-3 in Grey). **B:** Schematic diagram of SlpA secretion and processing in *C. difficile*. SlpA (Pink/Red/blue line) is translated in the cytosol (light green) and targeted for secretion across the membrane using SecA2 (Purple oval) most likely via the SecYEG Channel (Yellow/Orange). Cwp84 (Scissors) cleaves SlpA into low molecular weight (LMW, Red spheres) and high molecular weight (HMW, Blue spheres) S-layer protein (SLP) subunits. The HMW and LMW SLPs assemble to form hetero-dimers that incorporate into the S-layer. The surface of the S-layer consists largely of exposed LMW-SLP anchored to the cell wall (light blue) via cell wall binding domains of the HMW-SLP component (see A). **C:** Models of SlpA integration into the S-layer. (i) unfolded SlpA (red line) is secreted from specific points on the cell membrane - directed by gaps in the S-layer or cell wall (colored as in B), newly processed SlpA (LMW-SLP orange circles, HMW-SLP light blue ovals) is transported directly through the cell wall for integration into the S-layer. Alternatively; (ii) SlpA is translocated across the cell membrane at multiple sites. A pool of SlpA lays within the cell wall ready to fill gaps in the S-layer.

47 As an obligate anaerobe, *C. difficile* has been notoriously difficult to visualize using standard  
48 microscopy techniques with commonly used oxygen-dependent fluorescent proteins and this  
49 is further complicated by intrinsic autofluorescence in the green spectrum (Ransom, Ellermeier,  
50 & Weiss, 2015). To circumvent these problems, we have used a variety of labeling techniques  
51 to avoid the requirement for oxygen maturation and any overlap with autofluorescence. Using  
52 fluorescence microscopy, we identified areas of S-layer biogenesis and SlpA secretion to  
53 determine if this S-layer component is specifically targeted to growing parts of the cell. Firstly,  
54 we probed the localization of newly synthesized S-layer which was detected at discrete regions  
55 which coincided with areas of new cell wall biosynthesis. We continued by studying the  
56 internal localization of SecA2 and SlpA, discovering that SlpA is secreted all over the  
57 cytoplasmic membrane. Having observed delocalized secretion of SlpA, yet localized new  
58 surface S-layer, we conclude that there is a pool of SlpA that resides within the cell wall which  
59 is available to construct regions of the developing S-layer.

60

## 61 **Results**

### 62 *Newly synthesized S-layer co-localizes with areas of new cell wall*

63 During exponential growth, *C. difficile* cells are constantly growing and dividing, requiring the  
64 production of new peptidoglycan at the cell wall. The S-layer protects the cell envelope from  
65 innate immune effectors such as lysozyme and LL-37 (Kirk et al., 2017). This function requires  
66 that an S-layer barrier is maintained while new peptidoglycan is synthesized during growth.  
67 Peptidoglycan can be labelled by growing *C. difficile* cells in the presence of the fluorescent  
68 D-amino acid, HCC-amino-D-alanine (HADA), (Kuru et al., 2012). Subsequent chasing with  
69 unlabeled media and imaging of live cells (Figure 2A and Video 1) or fixed cells over a time  
70 course (Figure 2-figure supplement 1) reveals sites of newly synthesized peptidoglycan that

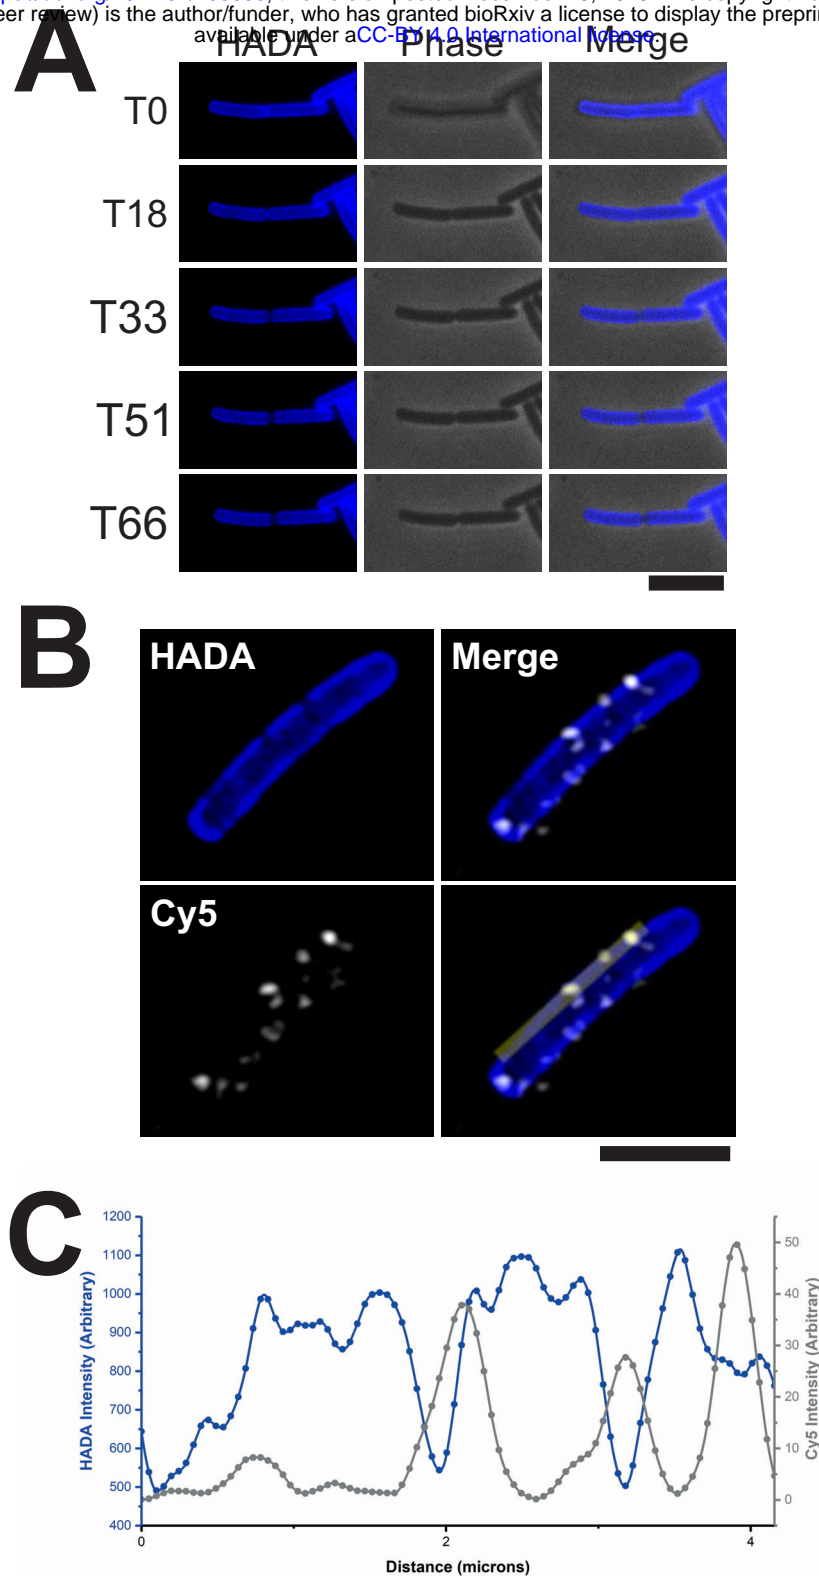

**Figure 2: New surface S-layer colocalizes with areas of new peptidoglycan synthesis.**

**A:** Examples of timepoints from real-time widefield fluorescent HADA signal (left panels) and phase contrast (center panels) of *C. difficile* 630 cells chased for HADA stain. Frame time represented in minutes, scale bar indicates 6  $\mu$ m. **B:** Airyscan confocal image of a *C. difficile* 630 cell grown with HADA to label peptidoglycan cell wall (Blue) and chased to reveal darker areas of newly synthesized cell wall. This chase was followed by a short expression of SlpAR<sub>20291</sub> which was specifically immunolabeled with Cy5 (White). Yellow bar indicates the region used for the intensity plot in C. Scale bar indicates 6  $\mu$ m. **C:** Intensity plot depicting signal from HADA (Blue) and Cy5 (Grey) along the yellow bar illustrated in B.

71 appear less intense for HADA. This pattern of HADA staining is seen at the dividing septum  
72 and along the long axis of the cell (Figure 2). Combining this with the inducible expression of  
73 the immunologically distinct SlpA<sub>R20291</sub> in *C. difficile* strain 630 (Figure 2-figure supplement  
74 2A), allowed areas of newly assembled S-layer to be visualized by immunofluorescence  
75 (Figure 2B and Figure 2-figure supplement 2B). Tracing the intensity of cell wall staining with  
76 the signal from newly synthesized surface SlpA reveals a crude anti-correlation (Figure 2C and  
77 Figure 2-figure supplement 3) and suggests that new S-layer is formed at areas of newly formed  
78 underlying cell wall. The areas of newly synthesized cell wall that are void of SlpA<sub>R20291</sub> signal  
79 are likely to be filled with endogenous SlpA<sub>630</sub> that is expressed at much higher levels, as  
80 observed in extracellular cell wall protein extracts (Figure 2-figure supplement 2A).

81 During cell division, a large amount of new surface SlpA can be detected at the septum (Figure  
82 3). This staining pattern suggests that S-layer is actively formed on the mother cell over the  
83 newly synthesized cell wall, preparing each daughter cell with a new S-layer cap before cell  
84 division is complete. Numerous cells display areas of new cell wall at one of their poles that  
85 co-insides with new S-layer staining (Figure 3). We interpret these as new daughter cells that  
86 have completed cell division during the HADA stain chase as detected in live cell imaging  
87 (Figure 2A and Video 1). New polar S-layer can be sorted into three categories: staining  
88 distributed over the whole cell cap, on the tip of the cap or at the sides of the new cap close to  
89 the older cell wall (Figure 3). Daughter cells with their poles completely covered in new S-  
90 layer have most likely expressed SlpA<sub>R20291</sub> throughout cell division and have SlpA<sub>R20291</sub>  
91 distributed all over the new S-layer cap. The apex of the cell cap marks the final place of new  
92 daughter cell formation and those caps stained just at the tip have probably expressed  
93 SlpA<sub>R20291</sub> towards the final stages of division as the two daughter cells separate and the cap is  
94 completed. Areas stained at the connecting edge between the pole and the main body of the  
95 cell must represent areas of growth once the S-layer cap was fully formed when cell division

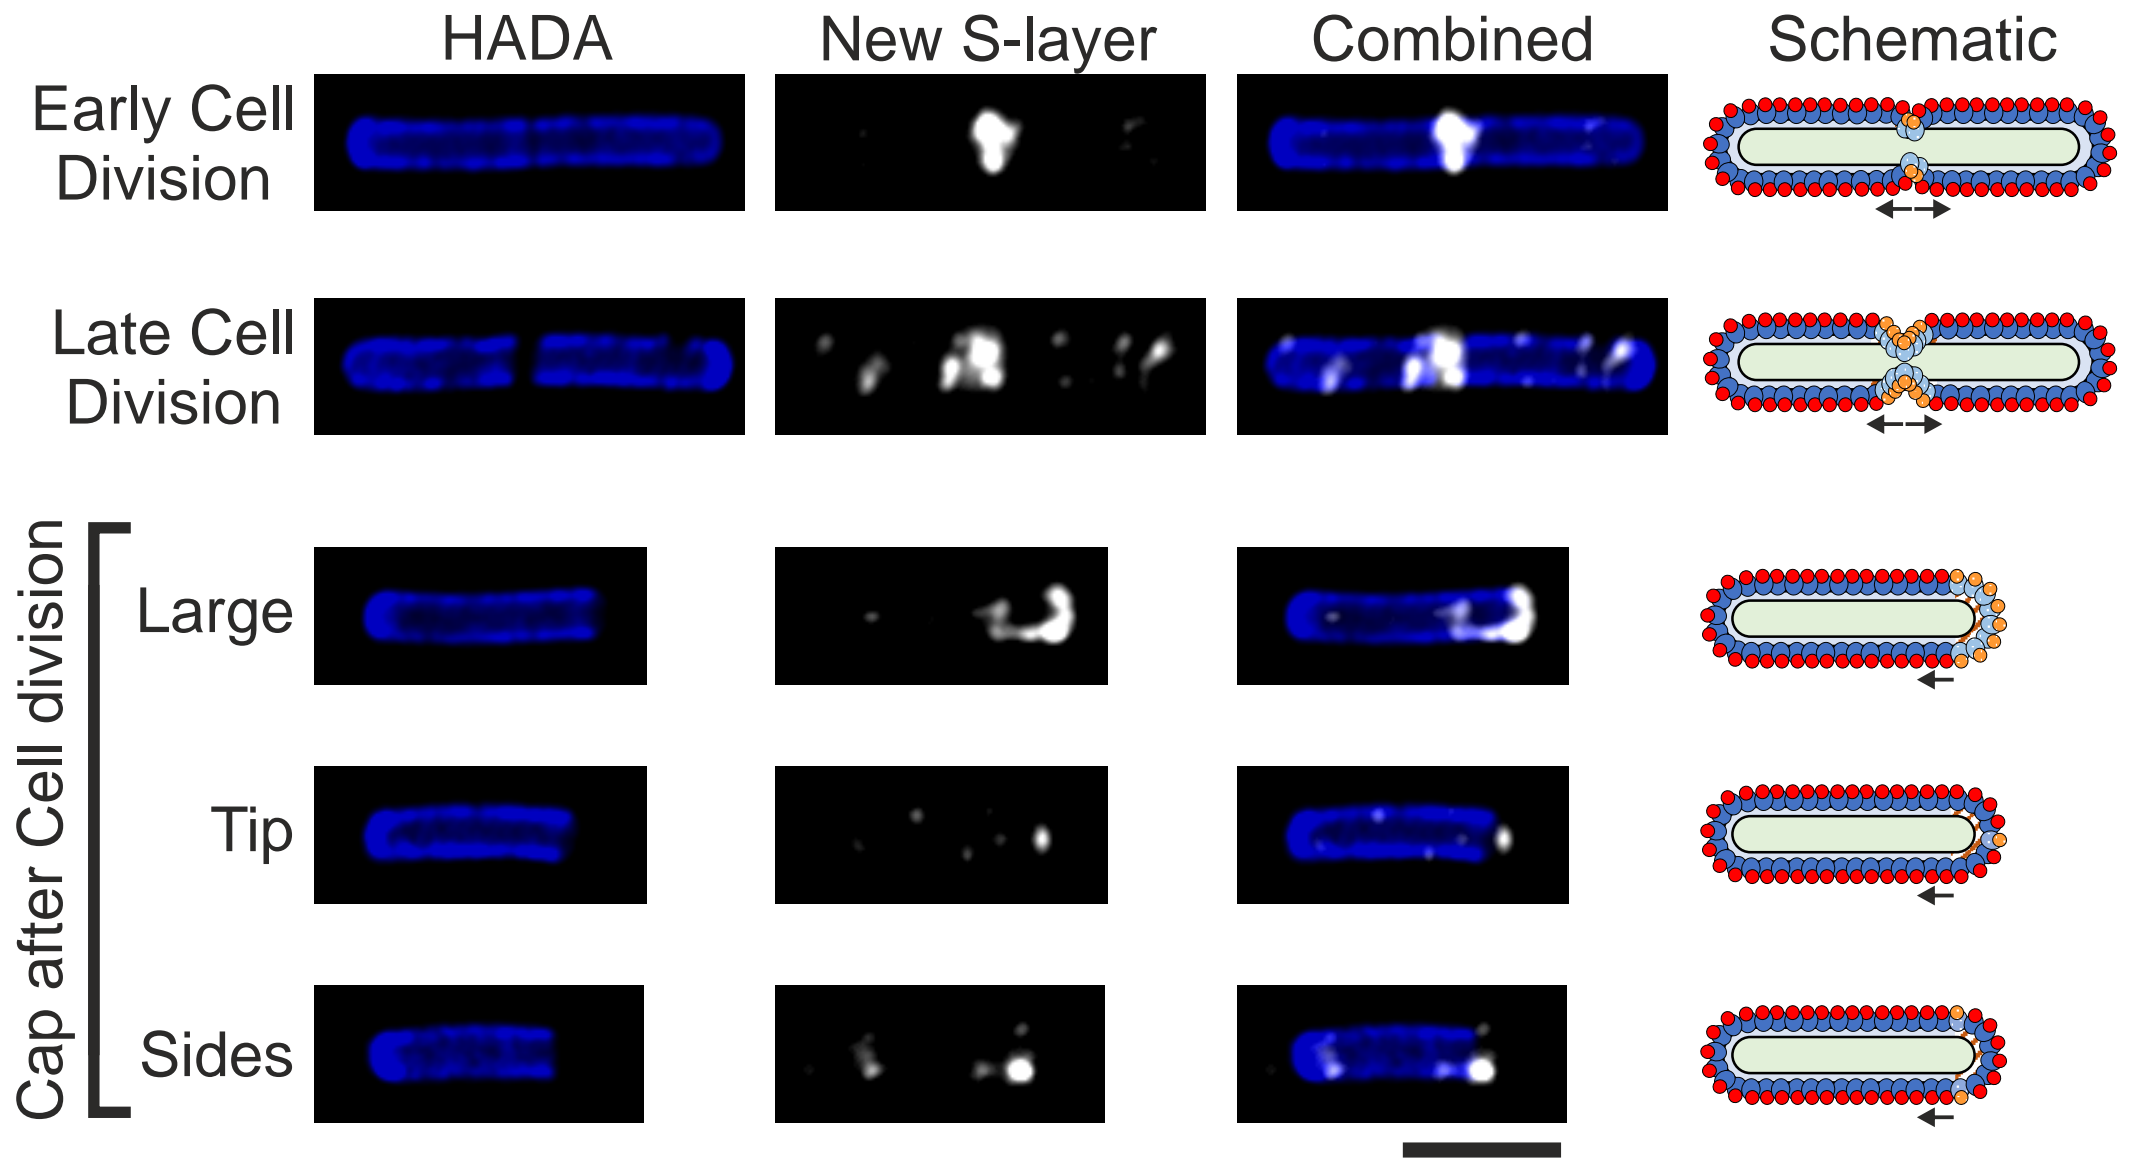

**Figure 3: S-layer formation during cell division.**

Airyscan confocal images of *C. difficile* 630 cells during and immediately after cell division with HADA labelled peptidoglycan cell wall (blue) and new surface SlpA<sub>R20291</sub> immunolabeled with Cy5 (white). Large, dark areas lacking HADA staining mark cell wall synthesis at the septum between cells or a newly produced cell pole. Scale bar indicates 3  $\mu$ m. On the right-hand side of each row is a schematic diagram illustrating the position of new surface SlpA<sub>R20291</sub> (HMW-SLP, spotted light blue and LMW-SLP, spotted orange) as detected in the corresponding microscopy images against the position of endogenous surface SlpA<sub>630</sub> (HMW-SLP, dark blue and LMW-SLP, red). The position of newly synthesized cell wall is displayed in brown/white stripes.



96 was completed. Together, these staining patterns support the hypothesis that S-layer is  
97 assembled on the mother cell at the septum to form polar caps for the daughter cells to maintain  
98 a continuous protective barrier following cell separation.

### 99 *SecA2 localization*

100 As newly synthesized S-layer is formed at specific points on the cell surface (Figure 3) we  
101 wanted to determine if these areas correlate with concentrated points of SlpA secretion from  
102 the cytosol. Having designated sites of secretion would allow the efficient targeting of S-layer  
103 precursors to where they are needed. As it has been shown that SecA2 is essential for cell  
104 survival (Dembek et al., 2015) and performs a critical role in SlpA secretion (Fagan &  
105 Fairweather, 2011), we assumed that intracellular positioning of SecA2 will reveal where SlpA  
106 is secreted. To confirm this, we set out to create a functional, fluorescently tagged SecA2 for  
107 monitoring SecA2 localization by microscopy. A *C. difficile* strain 630 mutant was generated  
108 that encodes a C-terminal SNAP-tagged SecA2 (SecA2-SNAP) on the genome in the original  
109 locus and under the control of the native promoter. SecA2-SNAP was the only SecA2 protein  
110 detected in membrane fractions by western immunoblot analysis (Figure 4-figure supplement  
111 1A) and, when stained with TMR-Star, this protein species was the only one visualized by in-  
112 gel fluorescence (Figure 4-figure supplement 1B). Cells expressing SecA2-SNAP displayed  
113 similar growth dynamics to the wild-type parental strain (Figure 4-figure supplement 1C),  
114 suggesting that the fusion protein is fully functional as SecA2 is essential for growth (Dembek  
115 et al., 2015). Imaging cells by widefield microscopy revealed that SecA2 is distributed  
116 throughout the cell and not localized to specific areas (Figure 4A). Higher resolution, Airyscan  
117 confocal images revealed the same widespread distribution but with pockets of higher intensity  
118 signal (Figure 4B). By combining SecA2 localization with HADA chase staining and new S-  
119 layer labelling, no correlation between SecA2 within the cell and areas of newly synthesized

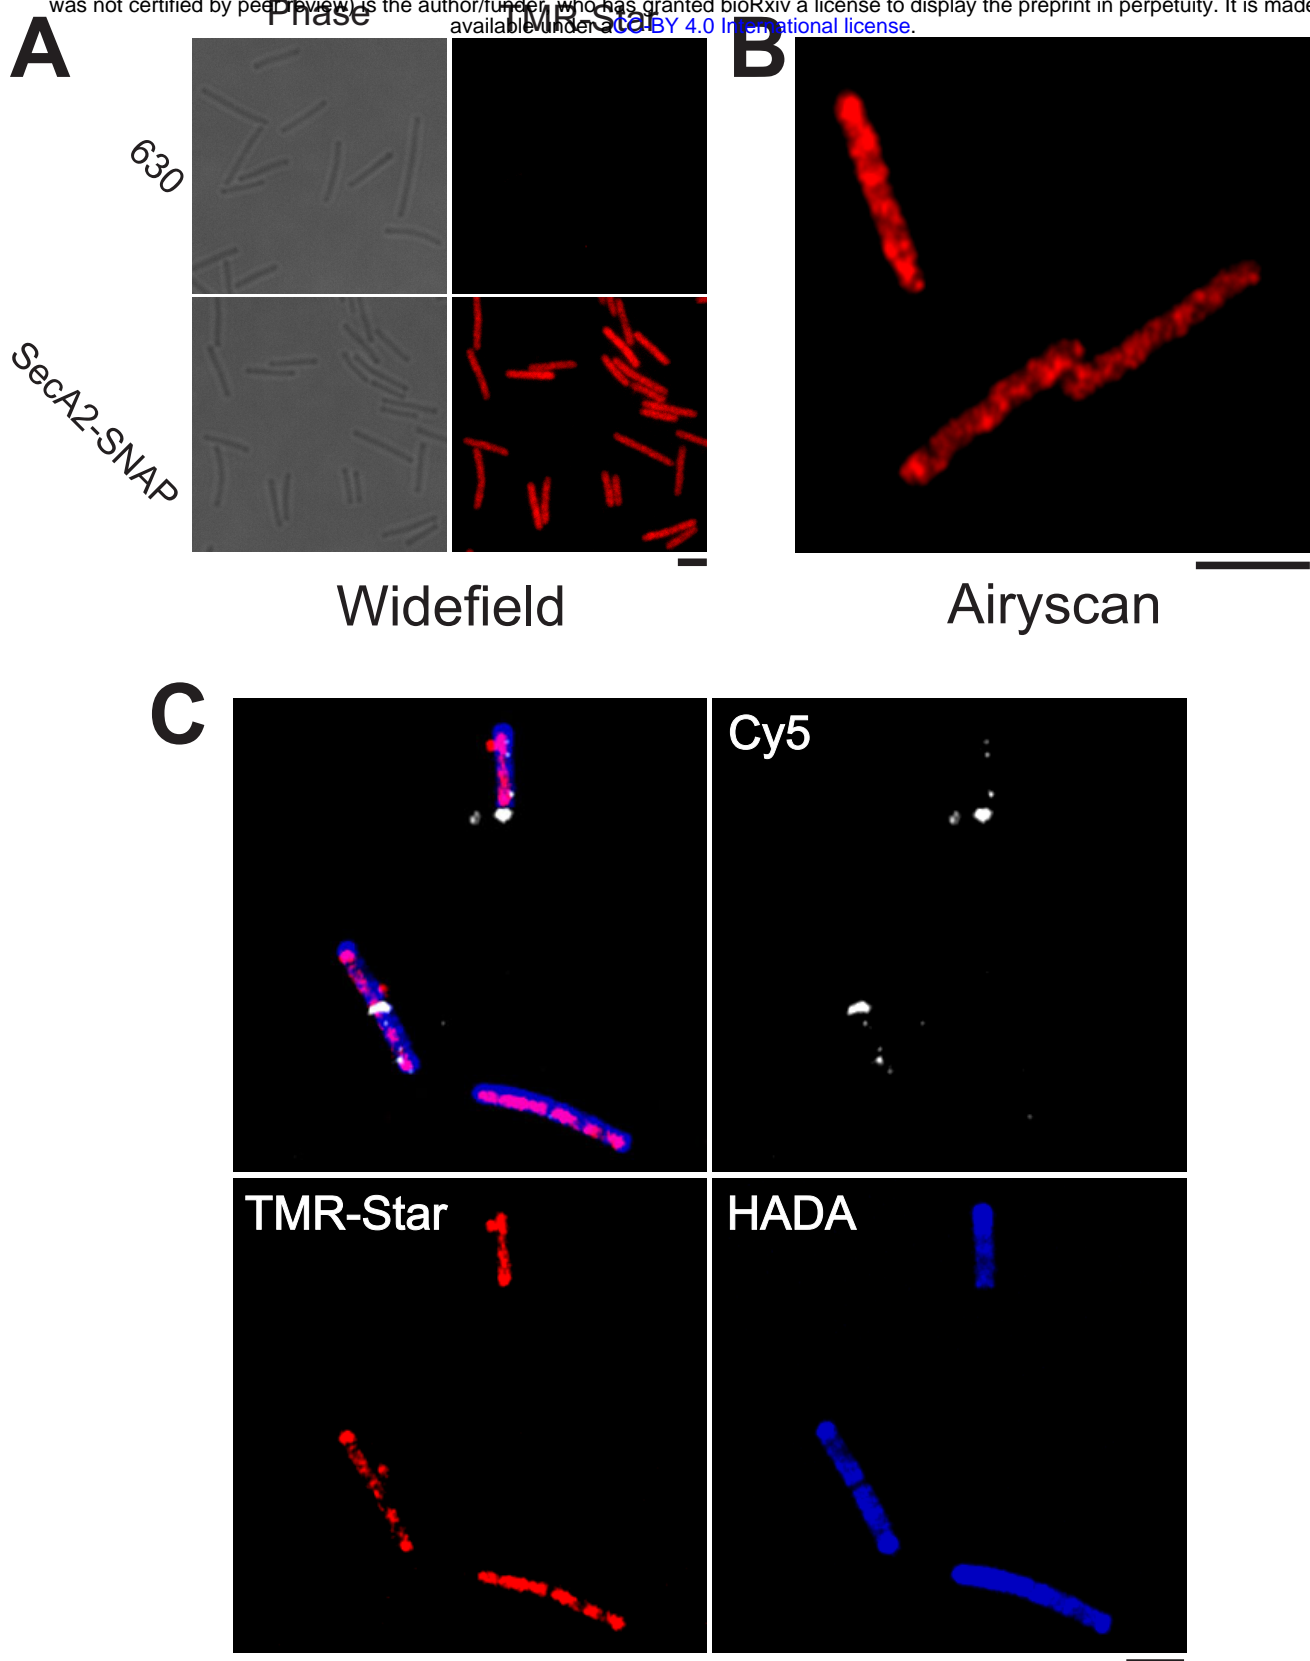

**Figure 4: SecA2-SNAP localization and new S-layer.**

**A:** Widefield phase contrast (left panels) and fluorescent (right panels) images of wild type *C. difficile* 630 or 630 *secA2-snap* cells stained with TMR-Star (red). Scale bar indicates 3  $\mu\text{m}$ . **B:** Airyscan confocal image displaying SecA2-SNAP-TMR-Star signal distribution in *C. difficile* 630 cells. Scale bar indicates 3  $\mu\text{m}$ . **C:** Airyscan confocal image showing the localization of SecA2-SNAP-TMR-Star (red) in relation to the synthesis of cell wall (dark patches lacking blue HADA stain) and newly synthesized S-layer (Cy5, white). Scale bar indicates 3  $\mu\text{m}$ .

120 S-layer on the cell periphery could be identified (Figure 4B). Together these data suggest that  
121 SecA2 is not the determining factor in localization of new S-layer growth.

## 122 *SlpA secretion*

123 Although SecA2 was visualized throughout the cell, SecA2 has additional secretory substrates  
124 (Fagan et al., 2011) so it is possible that secretion of SlpA itself may be localized. Although  
125 immunofluorescence has been used to detect surface SlpA, S-layer pore size is thought to be  
126 too small to allow the access of antibodies to proteins located in the cell wall or indeed within  
127 the cell (Fagan & Fairweather, 2014). To determine where SlpA is being secreted, two different  
128 SlpA fusion proteins were constructed, an SlpA-SNAP fusion that can be secreted and is found  
129 in the extracellular fraction and a SNAP tagged SlpA-dihydrofolate reductase (SlpA-DHFR-  
130 SNAP) fusion that associates with the cellular fraction (Figure 5A & Figure 5-figure  
131 supplement 1A). DHFR is a fast folding protein that has been used to block and probe protein  
132 translocation mechanisms for many years (Arkowitz, Joly, & Wickner, 1993; Bonardi et al.,  
133 2011; Eilers & Schatz, 1986; Rassow et al., 1989). Expressing SlpA-DHFR-SNAP decreases  
134 the secretion of native *C. difficile* extracellular proteins (Figure 5-figure supplement 1B) and  
135 leads to the build-up of precursor SlpA within the cell (Figure 5-figure supplement 2),  
136 consistent with DHFR blocking the SecA2 translocon. This effect requires the SlpA signal  
137 sequence, as an SlpA-DHFR-SNAP lacking the N-terminal signal sequence no longer blocks  
138 protein translocation (Figure 5-figure supplement 1B). Together these findings show that the  
139 SlpA-DHFR fusion used here is specifically targeted to and occupies the same secretory  
140 channel required for wild-type SlpA secretion. To prevent protein secretion, the DHFR domain  
141 must first fold correctly (Arkowitz et al., 1993) and will therefore only prevent secretion via  
142 the post-translational pathway. The lack of detectable SlpA-DHFR-SNAP in the extracellular  
143 fraction (Figure 5-figure supplement 1A) shows for the first time that SlpA is exclusively post-  
144 translationally translocated. Using these two SNAP fusion proteins we can now probe the

145

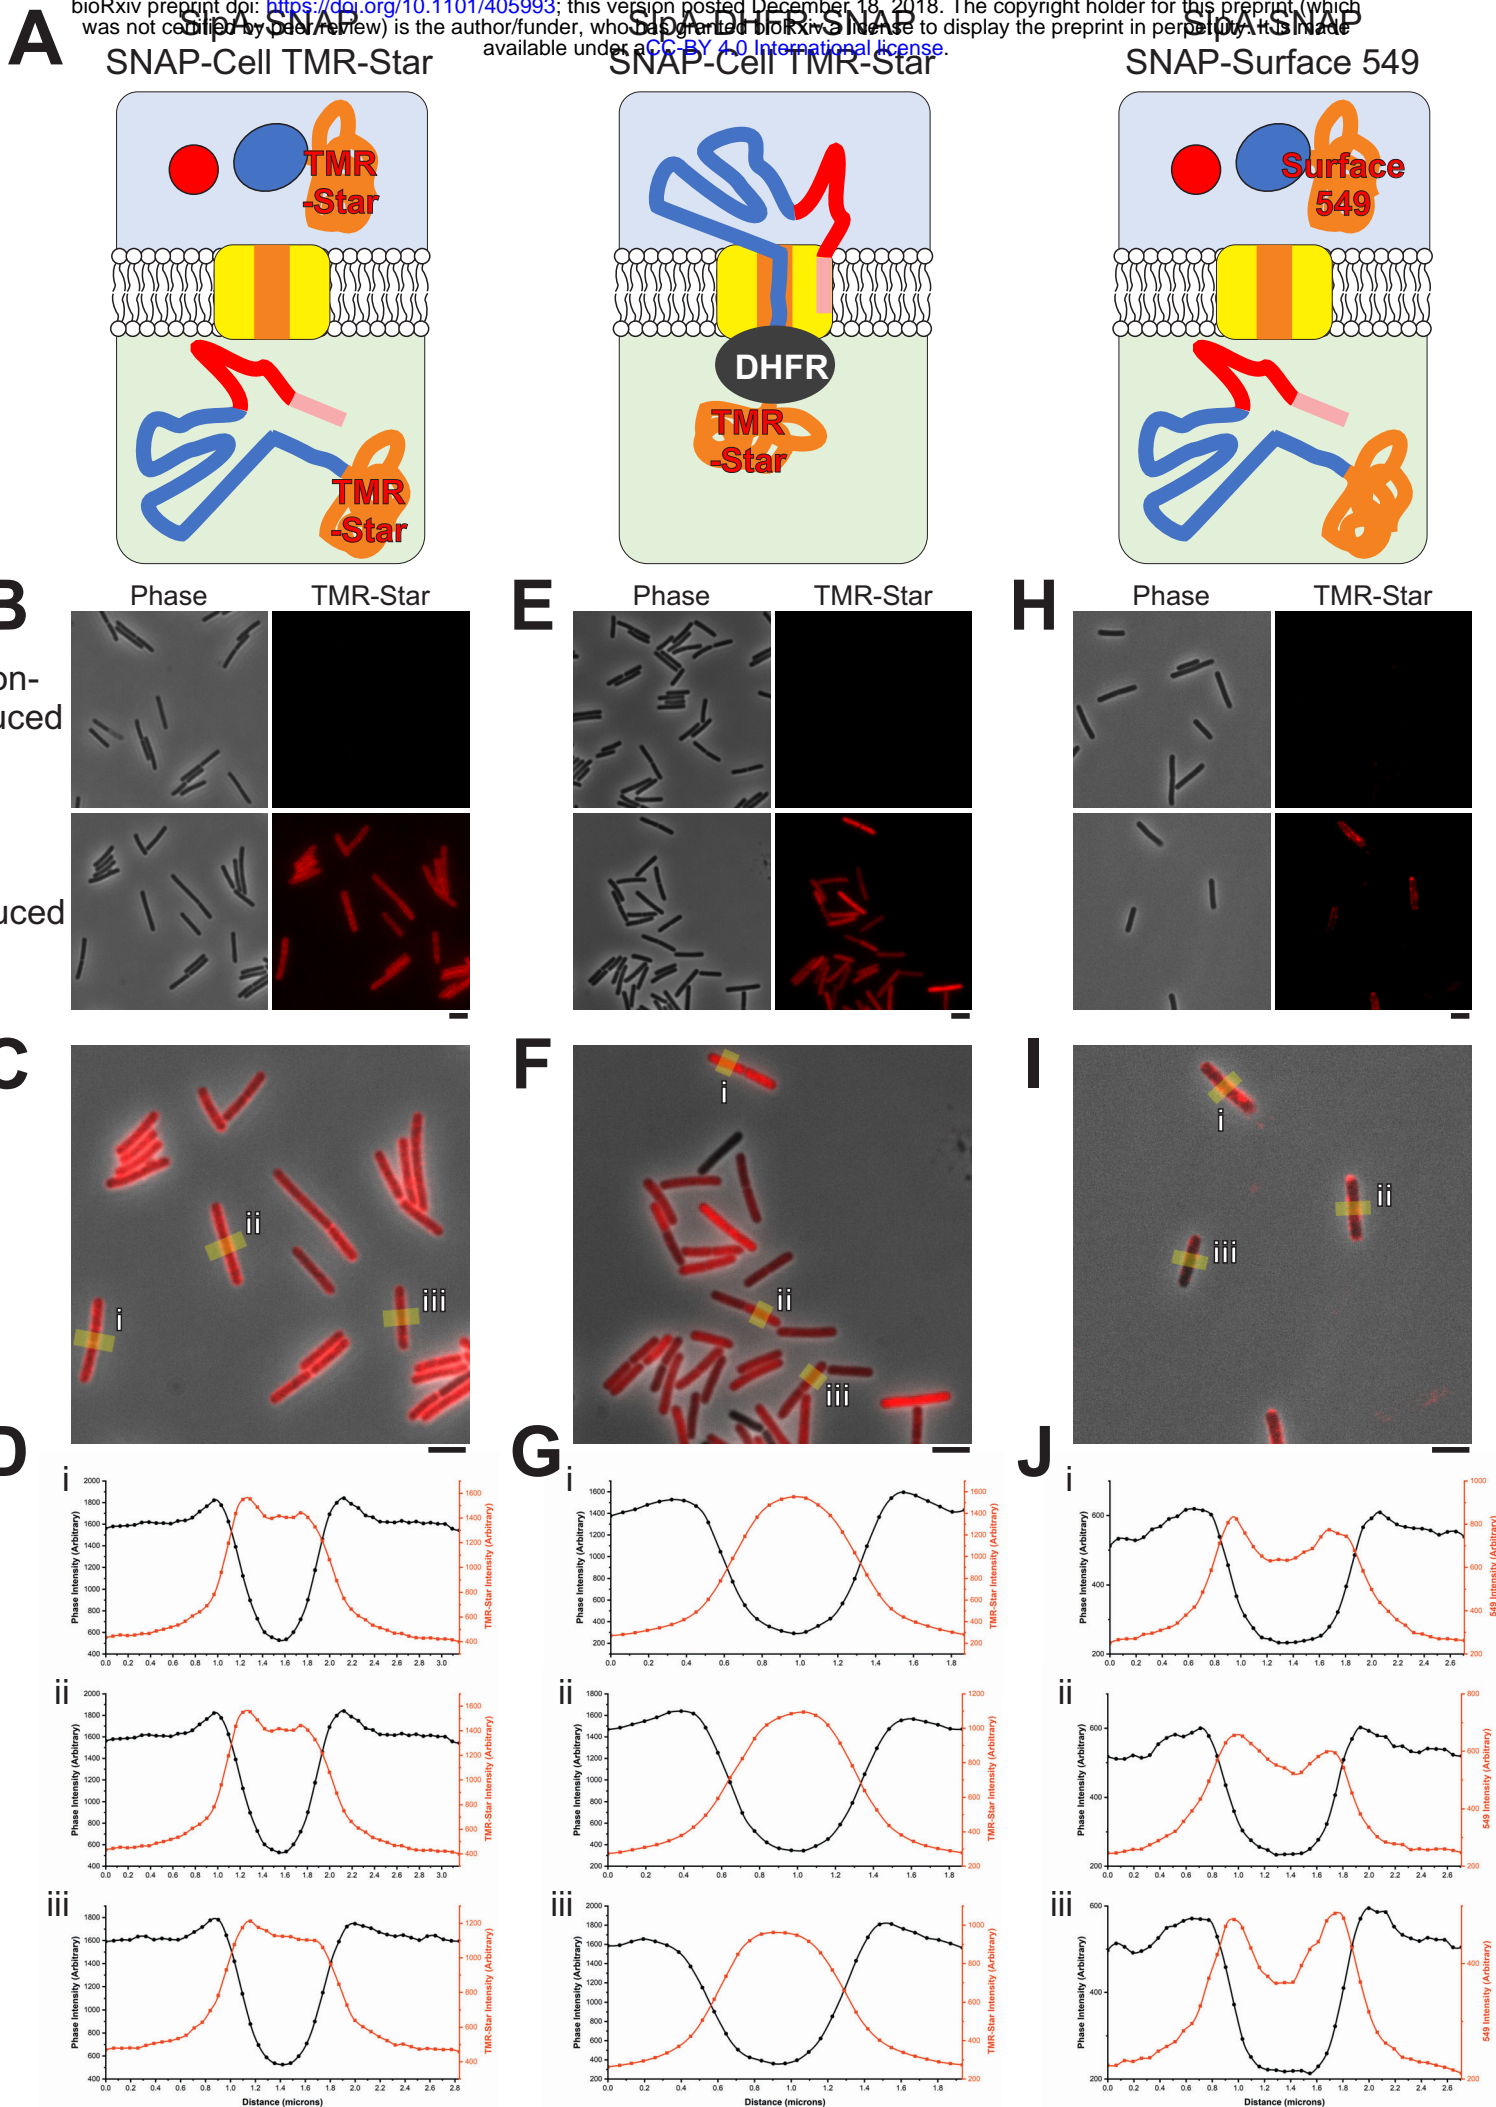

Figure 5

146 **Figure 5: Sites of S-layer secretion.**

147 **A:** Schematic diagram illustrating the position of stained SNAP tagged SlpA constructs  
148 expressed in *C. difficile* 630 cells: SNAP-Cell TMR-Star stained SlpA-SNAP (left panel) or  
149 SlpA-DHFR-SNAP (center panel) and SNAP-Surface 549 stained SlpA-SNAP (right panel).  
150 Colored as in Figure 1B with SNAP tags represented as an orange coil. SlpA-SNAP is exported  
151 and cleaved into LMW-SLP and HMW-SLP-SNAP. The DHFR domain (dark gray oval) of  
152 SlpA-DHFR-SNAP blocks the translocon channel during export, leaving the TMR-Star bound  
153 SNAP tag in the cytosol. SNAP-Surface 549 stains extracellular HMW-SLP-SNAP only.

154 **B:** Widefield phase contrast (left panels) and fluorescent SNAP-Cell TMR-Star signal (right  
155 panels) of *C. difficile* 630 cells stained with SNAP-Cell TMR-Star imaged with and without  
156 induction of SlpA-SNAP expression. Scale bar indicates 3  $\mu$ m. **C:** Overlay of fluorescent signal  
157 in the induced sample (from B) with areas taken for the plot profiles labelled (yellow lines, i-  
158 iii). Scale bar indicates 3  $\mu$ m. **D:** SlpA-SNAP-Cell TMR-Star profile plots of i-iii (from C) of  
159 phase contrast signal (black) and SNAP-Cell TMR-Star signal (red).

160 **E:** SlpA-DHFR-SNAP in *C. difficile* 630 cells (labelled as in B). **F:** Overlay of signal in the  
161 induced sample (from E, labelled as in C). **G:** SlpA-DHFR-SNAP-Cell TMR-Star profile plots  
162 of i-iii (from F) (labelled as in D).

163 **H:** Widefield phase contrast (left panels) and fluorescent SNAP-Surface 549 signal (right  
164 panels) of *C. difficile* 630 cells stained with SNAP-Surface 549 imaged with and without  
165 induction of SlpA-SNAP expression. **I:** Overlay of signal in the induced sample (from H,  
166 labelled as in C). **J:** HMW-SLP-SNAP-Surface 549 profile plots of i-iii (from I) of phase  
167 contrast signal (black) and SNAP-Surface 549 (red).

168 intercellular localization of SlpA secretion (SlpA-DHFR-SNAP) and localization once secreted  
169 (SlpA-SNAP).

170 After secretion, the SlpA-SNAP protein is processed as normal by the cell wall localized  
171 cysteine protease Cwp84, yielding the LMW-SLP subunit and a SNAP tagged HMW-SLP  
172 (HMW-SLP-SNAP). Widefield images show a diffuse distribution of HMW-SLP-SNAP on  
173 the cell surface with a halo of TMR-Star signal surrounding most of the cells (Figure 5B and  
174 C). Surface intensity plots reveal a broad cross-section of TMR-Star intensity across the cell  
175 width (Phase vs TMR-Star signal, Figure 5D). Within these cross-sections there are smaller  
176 peaks in TMR-Star intensity which correlate with the cell periphery, displayed as rapid changes  
177 in phase signal (Figure 5D), this is consistent with the detection of HMW-SLP-SNAP TMR-  
178 Star in the extracellular fraction (Figure 5-figure supplement 1A). Cells expressing SlpA-  
179 DHFR-SNAP show some heterogeneity of expression (Figure 5E and F), perhaps caused by  
180 leaky expression leading to a negative selective pressure for the plasmid and the drastic effects  
181 this DHFR fusion protein has on secretion (Figure 5-figure supplement 1C). Again, the signal  
182 from SlpA-DHFR-SNAP appears diffuse throughout the cell and not located at specific sites  
183 (Figure 5E and F). Signal intensity traces reveal a narrow TMR-Star signal peak towards the  
184 interior of the cell where the phase signal is low (Figure 5G), suggesting a more intracellular  
185 location for SlpA-DHFR-SNAP than HMW-SLP-SNAP which is consistent with SlpA-DHFR-  
186 SNAP being trapped in the cell at the membrane (Figure 5-figure supplement 1A).

187 To obtain a clearer image of newly secreted extracellular HMW-SLP-SNAP, cells were treated  
188 with SNAP-Surface 549 (Figure 5H and I) that specifically stains extracellular proteins (Figure  
189 5-figure supplement 1A) and should reduce the intracellular SlpA-SNAP background staining  
190 observed with SNAP-Cell TMR-Star (Figure 5A and Figure 5-figure supplement 1A). HMW-  
191 SLP-SNAP-Surface 549 outlines of cells were visible in widefield (Figure 5H) and Airyscan  
192 confocal imaging (Figure 5-figure supplement 3). Surface density plots of cross-sections of



193 these cells have SNAP-Surface 549 signal peaks towards the cell periphery (Figure 5J) which  
194 supports the similar extracellular staining pattern seen with SNAP-cell TMR-star (Figure 5D).  
195 However, the intensity of the HMW-SLP-SNAP-Surface 549 appears uneven and pockets of  
196 higher intensity signal can be observed (Figure 5-figure supplement 3) that may relate to where  
197 HMW-SLP accumulates post-secretion and where this protein inserts into the S-layer. The  
198 distribution of signal in these images suggest that SlpA secretion occurs over the majority of  
199 the cell's surface and not just at sites where new S-layer is being formed.

200

## 201 **Discussion**

202 For an S-layer to function correctly it must completely encapsulate the cell (de la Riva, Willing,  
203 Tate, & Fairweather, 2011; Kirk et al., 2017). We propose here that S-layer is assembled at  
204 areas of newly synthesized peptidoglycan to maintain a stable S-layer that continually protects  
205 the *C. difficile* cell. Although newly synthesized SlpA is secreted from all regions of the cell,  
206 only a relatively small proportion of this was detected at the surface. This irregularity suggests  
207 that *C. difficile* possess reserves of SlpA beneath the S-layer in the cell wall (Figure 6).  
208 Although excess SlpA production and storage will be quite energetically expensive for the cell,  
209 this reservoir of SlpA could provide a positive fitness advantage by allowing cells to respond  
210 quickly to repair gaps in this critical barrier (Figure 6). Examples of self-repair mechanisms  
211 are present thorough all forms of life from intracellular vesicular mediated membrane healing  
212 (McNeil & Baker, 2001; Tang & Marshall, 2017) up to a tissue level such as wound healing  
213 (Greaves, Ashcroft, Baguneid, & Bayat, 2013). In addition to allowing rapid repair, by having  
214 a stockpile of SlpA in the cell wall, *C. difficile* may also create a buffer to reduce the amount  
215 of *de novo* SlpA translation and translocation required to safely complete cell division. It is not

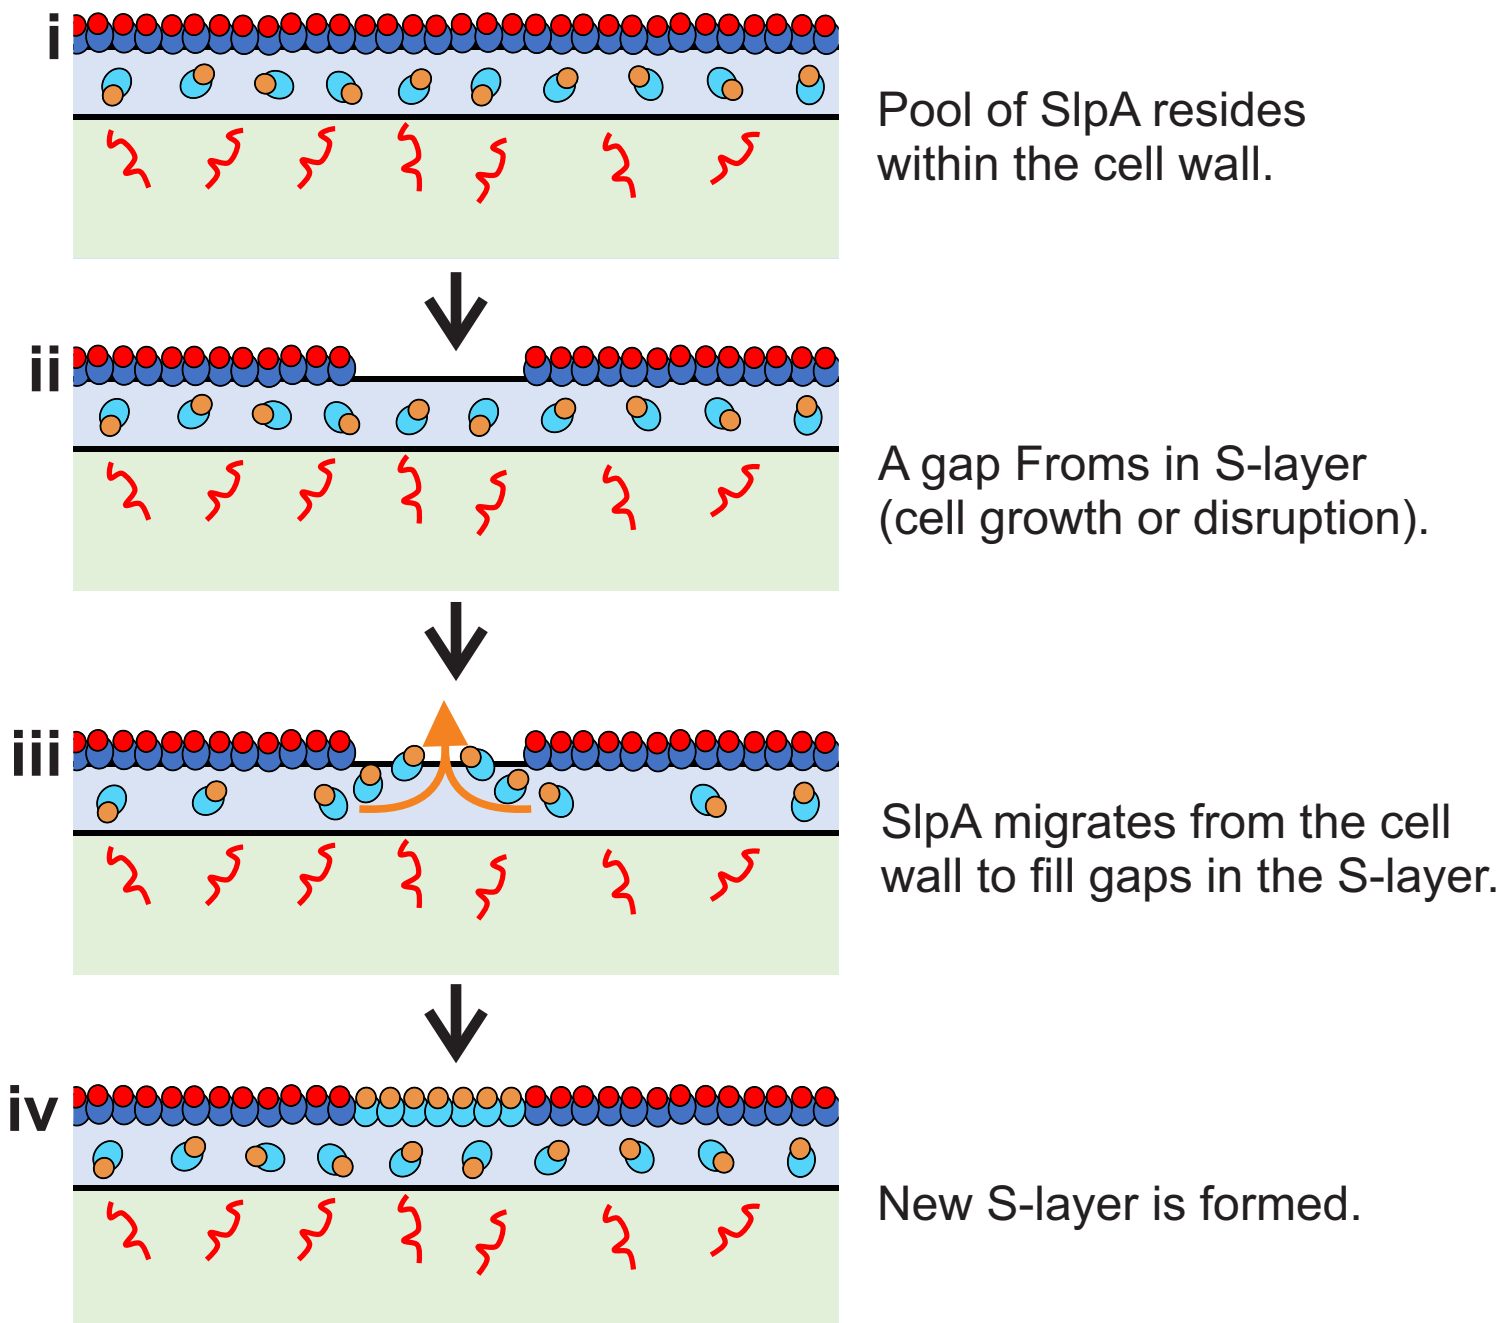

**Figure 6: Model of S-layer in the cell wall.**

Schematic flow diagram of SlpA secretion and S-layer formation (colored as in Figure 1C). During normal cell growth SlpA is targeted by SecA2 for secretion all over the cytosolic membrane. A store of SlpA resides within the cell wall where it is processed ready for integration into the S-layer (i). Gaps may form in the S-layer due to cell growth or injury (ii). SlpA in the cell wall diffuses out (iii) and fills openings in the S-layer (iv).



216 clear how large this buffer is and it would be interesting to identify the proportion of SlpA that  
217 lays below the S-layer, in reserve.

218 Although the S-layer is a rigid structure (Mescher & Strominger, 1976), fractures in the S-layer  
219 must form to allow the cells to grow. Our data suggests that these fractures coincide with new  
220 peptidoglycan synthesis and that new SlpA emerges through these gaps to be incorporated into  
221 the crystalline lattice. Higher resolution imaging techniques may allow the direct observation  
222 these gaps in the S-layer and how the separate S-layer sections assemble. When new S-layer  
223 and secreted HMW-SLP-SNAP was labelled (Figure 2B, Figure 2-figure supplement 3 and  
224 Figure 5-figure supplement 3) and intracellular SecA2-SNAP was detected (Figure 4B), regular  
225 patterns and sometimes diagonal staining could be seen along the longitudinal axis of the cell.  
226 These patterns may relate the localization of SecA2 and newly forming S-layer in line with  
227 intracellular cytoskeletal and motor proteins that power cell growth (Colavin, Shi, & Huang,  
228 2018).

229 We have also demonstrated for the first time that SlpA is secreted post-translationally. Proteins  
230 transported in this way usually interact with cytosolic chaperones that prevent folding prior to  
231 translocation (Kim & Kendall, 2000). The identity of these chaperones and the exact role  
232 SecA2 plays in SlpA secretion has yet to be determined. Since SlpA must undergo a post-  
233 secretion protease modification (Figure 1) (Kirby et al., 2009), having a dwell time in the cell  
234 wall will allow time for correct processing. However this also poses the question of how S-  
235 layer components located there are prevented from oligomerizing (Takumi, Koga, Oka, &  
236 Endo, 1991) prior to assembly at the surface. It is tempting to speculate that the S-layer  
237 assembly pathway may also involve extracellular chaperones to facilitate processing and  
238 targeting while preventing premature self-assembly. The revelation that there is a pool of SlpA  
239 in the cell wall and the accessibility of the cell wall to drugs may provide opportunities for the

240 identification of novel narrow spectrum targets that affect the assembly of this essential  
241 virulence factor.

242 In summary, we have found that S-layer is formed at sites of cell wall synthesis and there is an  
243 underlying supply of the S-layer precursor, SlpA, located throughout the cell wall.

244

## 245 **Methods**

### 246 **Media and Growth Conditions**

247 All strains, plasmids and oligonucleotides used in this investigation are displayed in Table 1.  
248 CA434 and NEB5 $\alpha$  *E. coli* were grown in LB broth or on LB agar supplemented when required  
249 with 15  $\mu$ g/ml chloramphenicol for plasmid selection. *C. difficile* were grown in reduced TY  
250 (3% tryptose, 2% yeast extract) broth or on Brain Heart Infusion agar under strict anaerobic  
251 conditions. Cultures were supplemented with 15  $\mu$ g/ml thiamphenicol when selecting for  
252 plasmids.

253 For SlpA-hDHFR-Strep Tag II expression, bacteria were subcultured from overnight cultures  
254 to an OD<sub>600nm</sub> of 0.05, grown for 30 minutes and then supplemented with 200  $\mu$ M methotrexate.  
255 Bacteria were then grown for a further 30 minutes before expression was induced with 20 ng/ml  
256 anhydrotetracycline (Atc). Bacteria were grown for a further 3 hours before harvesting at 4,000  
257 xg, for 10 min at 4°C.

### 258 **Molecular Biology**

259 Chemically competent *E. coli* were transformed by heat shock using standard methods and  
260 plasmids were transferred to *C. difficile* strain 630 by conjugation using the *E. coli* donor strain  
261 CA434 (Kirk & Fagan, 2016). Standard techniques were used for PCR, restriction digestion,  
262 ligation and Gibson assembly. DNA modifications were performed using Phusion High-  
263 Fidelity DNA Polymerase (Thermo Fisher) and Q5 Site-Directed Mutagenesis Kit (NEB) as  
264 per manufacturers' instructions.

### 265 **Plasmid Construction**

266 pRFP233 (Kirk et al., 2017) was modified to add the tetracysteine (Tc) tag encoding sequence  
267 into *slpA* such that a modified LMW-SLP is produced with FLNCCPGCCMEP added to a

268 surface-exposed loop. The plasmid was linearized by inverse PCR using oligonucleotides  
269 RF411 and RF412, deleting 150 bp of the LMW-SLP coding sequence. A synthetic DNA  
270 fragment including the deleted 150 bp and 36 bp encoding the Tc tag was inserted by Gibson  
271 assembly, yielding plasmid pRPF238.

272 For the addition of the SNAP tag to SecA2, *secA2* was amplified using RF216 and RF217 from  
273 gDNA and digested using SacI/XhoI. *snap* was amplified from pFT46 (Pereira et al., 2013)  
274 using RF218 and RF219 and digested with BamHI/XhoI. These fragments were then ligated  
275 into SacI/BamHI digested pRPF144 (Fagan & Fairweather, 2011) in a 3-fragment ligation  
276 reaction yielding pJAK014. *secA2-snap* was excised using SacI/BamHI and ligated into  
277 similarly treated pRPF185 yielding pJAK038.

278 Modification of the *C. difficile* 630 genome was achieved by allele exchange as described  
279 previously (Cartman, Kelly, Heeg, Heap, & Minton, 2012). The *snap* coding sequence and the  
280 last 1.2 kb of *secA2* was amplified by PCR using RF635 and RF636, using pJAK014 as a  
281 template. 1.2 kb downstream of *secA2* was amplified by PCR using RF637 and RF638 using  
282 gDNA as a template. pMTL-SC7315 (Cartman et al., 2012) was linearised by PCR using  
283 RF311 and RF312. The three fragments were ligated by Gibson assembly yielding pJAK067.  
284 To improve the enzymatic activity of the expressed fusion protein, the size of the linker  
285 between SecA2 and SNAP was increased. pPOE032 was prepared by inverse PCR of pJAK067  
286 with RF1079 and RF1080 via a site-Directed Mutagenesis Kit (NEB) as per manufacturer's  
287 instructions.

288 An *slpA<sub>630</sub>-strep tag II* encoding SacI/BamHI insert was excised from pRPF173 and ligated  
289 into a SacI/BamHI digested pRPF185 yielding pPOE005. pPOE005 was modified to add the  
290 coding sequence for *hDHFR-myc* within *slpA<sub>630</sub>-strep tag II*. *hDHFR-myc* was amplified using  
291 RF721 and RF722 and ligated into XhoI linearized pPOE005 to give pPOE002. Sequence

292 encoding a 3xHA tag was added to *slpA<sub>630</sub>-hDHFR-myc* by inverse PCR of pPOE005 with  
293 RF811 and RF812 by site-directed mutagenesis, as described earlier, to create pPOE003. The  
294 sequence encoding the SlpA<sub>630</sub>-hDHFR-Strep Tag II signal peptide in pPOE002 was removed  
295 by inverse PCR site-directed mutagenesis with RF789 and RF790 to create pPOE011.  
296 pPOE023 was prepared by ligation of the *slpA<sub>630</sub>* SacI/XhoI insert from pPOE005 into  
297 SacI/XhoI digested pJAK038 vector.

298 To add a SNAP tag to SlpA<sub>630</sub>-hDHFR-Strep Tag II, pPOE002 was linearized by PCR using  
299 RF866 and RF867. *snap* was amplified from pJAK038 using RF868 and RF869. These  
300 fragments were then NotI/BamHI digested and ligated yielding pJAK085.

301

## 302 **Microscopy**

303 SNAP Cell TMR-Star and SNAP-Surface 549 Staining: cells were grown from an OD<sub>600nm</sub>  
304 0.05 to 0.4 and treated with 250 μM TMR-Star for at least 30 minutes. Transient expression of  
305 SlpA-SNAP or SlpA-DHFR-SNAP was induced for 10 minutes with 10 ng/ml Atc before  
306 fixation or 20 ng/ml for 1 hour for in-gel fluorescence experiments.

307 HADA Staining: Cells were grown to an OD<sub>600nm</sub> of approximately 0.1 before the addition of  
308 0.5 mM HADA and continued growth for at least 2 hours to an OD<sub>600nm</sub> of 0.5-0.6. To chase  
309 the HADA staining, cells were harvested at 4,000 x g for 5 minutes, washed once by  
310 resuspension in 8 ml reduced TY and finally resuspended in 2x the original volume of reduced  
311 TY media before continuing growth for up to 30 minutes. In the case of transient SlpA<sub>R20291</sub>  
312 expression the cells were grown for 25 minutes before inducing the expression with 100 ng/ml  
313 Atc for the final 5 minutes before fixation.

314 Live-cell sample preparation: After the wash with 8 ml TY (as described above), HADA  
315 stained cells were resuspended in reduced TY to an OD of approx. 50. 0.5 OD<sub>600</sub>U of cells  
316 were transferred in an anaerobic chamber to a glass bottom petri dish (ibidi) at the interface  
317 between the glass coverslip and a 1% agarose pad that covered the entire surface of the dish  
318 and had been reduced for at least 3 hours. The petri dish was tightly wrapped in parafilm under  
319 anaerobic conditions before immediately been transferred at 37°C to a widefield microscope  
320 chamber pre-heated to 37°C for imaging.

321 Fixation: Cells were harvested at 4,000 x g for 5 minutes at 4°C, washed two times in 1 ml ice  
322 cold PBS with spins at 8,000 x g for 2 min at 4°C before being fixed with 4% paraformaldehyde  
323 in PBS for 30 minutes at room temperature. After fixation, cells were washed three times in  
324 PBS. For immunofluorescence the fixed cells were blocked overnight with 3% BSA in PBS at  
325 4°C. Cells were harvested at 8,000 x g for 2 min at 4°C, resuspended in 1:500 Primary antibody  
326 (Mouse Anti-027 SlpA<sub>R20291</sub> LMW-SLP) and incubated at room temperature for 1 hour. Cells  
327 were then washed three times in 1 ml 3% BSA in PBS before being resuspended in 1:500  
328 secondary antibody (Goat anti-mouse-Cy5, Thermo Fisher). Cells were incubated for 1 hour at  
329 room temperature then washed three times in 3% BSA in PBS before being resuspended in  
330 PBS. Washed cells were dried down to glass cover slips and mounted with SlowFade Diamond  
331 (Thermo Fisher).

332 Images were taken on a Nikon Ti eclipse widefield imaging microscope using NIS elements  
333 software or a ZEISS LSM 880 with Airyscan using ZEN imaging software. Image J based FiJi  
334 was used for image analysis.

### 335 **Cell Fractionation**

336 Extracellular protein extraction: Cells were harvested at 4,000 x g for 5 minutes at 4°C. In all  
337 the following wash steps bacterial cells we centrifuged at 8,000 x g for 2 minutes. Pellets were

338 washed twice by resuspension in 1 ml ice cold PBS. Cells were treated with 10  $\mu$ l per OD<sub>600nm</sub>U  
339 of extraction buffer (0.2 M Glycine, pH 2.2) and incubated at room temperature for 30 minutes  
340 to strip extracellular proteins. Stripped cells were harvested and the supernatant, containing  
341 extracellular protein, was taken and neutralized with 0.15  $\mu$ l 1.5 M Tris pH 8.8 per 1  $\mu$ l extract.  
342 The stripped cells were washed twice in 1 ml ice cold PBS before being frozen at -80C. Cells  
343 were thawed and then resuspended in 11.5  $\mu$ l per OD<sub>600nm</sub>U cell lysis buffer (PBS, 1x protease  
344 inhibitor cocktail, 5 mM EDTA, 20 ng/ml DNase, 120 mg/ml purified CD27L endolysin  
345 (Mayer, Garefalaki, Spoerl, Narbad, & Meijers, 2011)). Lysis was induced by incubating at  
346 37°C shaking for 30 minutes. Cell membranes were harvested by centrifugation at 20,000 x g  
347 for 20 minutes and the soluble intracellular protein fraction retained before the pellet was  
348 washed twice with 1 ml PBS. Membranes were solubilized using 11.5  $\mu$ l per OD<sub>600nm</sub>U  
349 solubilization buffer (1x PBS, 1x Protease Arrest, 5 mM EDTA, 20 ng/ml DNase, 1.5%  
350 sarkosyl) and agitated by rotating for 1 hour at room temperature. Insoluble material was  
351 harvested at 20,000 x g for 5 minutes and the solubilized membrane fraction was taken.  
352 Alternatively, for the SNAP tagged SlpA constructs; cells lysates were supplemented with  
353 1.5% sarkosyl, incubated for 1 hour and harvested at 20,000 x g for 5 minutes to create a total  
354 cellular extract.

### 355 **Protein Gels**

356 Proteins were separated using standard SDS-PAGE techniques on a mini-protein III system  
357 (Bio-Rad) before being either; analyzed for in-gel fluorescence on a ChemiDoc imaging system  
358 (Bio-Rad), stained with Coomassie or transferred to nitrocellulose membranes using a semi-  
359 dry blotter (Bio-Rad) for western blot analysis. Band intensities were measured using Image  
360 Lab Software (Bio-Rad).

### 361 **Statistics**

362 Statistics were performed in Origin using one-way analysis of variance (ANOVA), a difference  
363 with  $p \leq 0.05$  was considered significant.

364



365 **Table 1: Strains, plasmids and oligonucleotides used in this study**

| <b>Strain</b>         | <b>Characteristics</b>                                                                                                          | <b>Source</b>          |
|-----------------------|---------------------------------------------------------------------------------------------------------------------------------|------------------------|
| R20291                | <i>C. difficile</i> ribotype 027 strain isolated during an outbreak at Stoke Mandeville hospital, UK in 2006                    | (Stabler et al., 2009) |
| 630                   | <i>C. difficile</i> ribotype 012 strain isolated during an outbreak in a hospital in Zurich, Switzerland in 1982                | (Sebahia et al., 2006) |
| 630 <i>secA2-snap</i> | <i>C. difficile</i> strain 630 with the sequence encoding SNAP added to the 3' end of the <i>secA2</i> gene in the native locus | This study             |
| CA434                 | <i>E. coli</i> strain CA434 (HB101 carrying R702)                                                                               | (Purdy et al., 2002)   |
| <b>Plasmid</b>        | <b>Description</b>                                                                                                              | <b>Source</b>          |
| pFT46                 | P <sub>tet</sub> <i>snap</i>                                                                                                    | (Pereira et al., 2013) |
| pJAK014               | P <sub>cwp2</sub> <i>secA2-snap</i>                                                                                             | This study             |
| pJAK038               | P <sub>tet</sub> <i>secA2-snap</i>                                                                                              | This study             |
| pJAK067               | pMTL-SC7315 modified to place <i>secA2-snap</i> on the <i>C. difficile</i> 630 chromosome                                       | This study             |

|             |                                                                                                                                                                                                                  |                             |
|-------------|------------------------------------------------------------------------------------------------------------------------------------------------------------------------------------------------------------------|-----------------------------|
| pJAK085     | $P_{tet}$ <i>slpA</i> <sub>630</sub> - <i>hDHFR</i> - <i>myc</i> - <i>snap</i>                                                                                                                                   | This study                  |
| pMTL-SC7315 | Allele exchange vector                                                                                                                                                                                           | (Cartman et al., 2012)      |
| pPOE002     | $P_{tet}$ <i>slpA</i> <sub>630</sub> - <i>hDHFR</i> - <i>myc</i> - <i>strep tag II</i>                                                                                                                           | This study                  |
| pPOE003     | $P_{tet}$ <i>slpA</i> <sub>630</sub> - <i>hDHFR</i> - <i>myc</i> - <i>3xHA</i>                                                                                                                                   | This study                  |
| pPOE005     | $P_{tet}$ <i>slpA</i> <sub>630</sub> - <i>strep tag II</i>                                                                                                                                                       | This study                  |
| pPOE011     | $P_{tet}$ $\Delta$ <i>signal sequence</i> ( $\Delta$ <i>N2-A24</i> )- <i>slpA</i> <sub>630</sub> -<br><i>hDHFR</i> - <i>myc</i> - <i>strep tag II</i>                                                            | This study                  |
| pPOE023     | $P_{tet}$ <i>slpA</i> <sub>630</sub> - <i>snap</i>                                                                                                                                                               | This study                  |
| pPOE032     | pMTL-SC7315 with <i>secA2</i> -(AEAAAKA)<br>Linker- <i>snap</i>                                                                                                                                                  | This study                  |
| pRPF173     | $P_{tet}$ <i>slpA</i> <sub>630</sub> - <i>strep tag II</i>                                                                                                                                                       | This Study                  |
| pRPF144     | $P_{cwp2}$ <i>gusA</i>                                                                                                                                                                                           | (Fagan & Fairweather, 2011) |
| pRPF185     | $P_{tet}$ <i>gusA</i>                                                                                                                                                                                            | (Fagan & Fairweather, 2011) |
| pRPF233     | $P_{tet}$ <i>slpA</i> <sub>R20291</sub>                                                                                                                                                                          | (Kirk et al., 2017)         |
| pRPF238     | $P_{tet}$ <i>slpA</i> <sub>R20291</sub><br><br><i>slpA</i> <sub>R20291</sub> modified such that the encoded<br>LMW SLP contains a tetra cysteine motif<br>(FLNCCPGCCMEP) in a predicted surface-<br>exposed loop | This study                  |

| Oligo  | Sequence                                           | Use                                                                      |
|--------|----------------------------------------------------|--------------------------------------------------------------------------|
| RF216* | GATCGAGCTCGGACAATAGAAAAG<br>GAGGTACTTATATG         | To amplify <i>secA2</i> with a 5'<br>SacI site                           |
| RF217* | GATCCTCGAGGTAAATTTATATA<br>AGTATTGCACTGTTGC        | To amplify <i>secA2</i> with a 3'<br>XhoI site                           |
| RF218* | GATCCTCGAGGCAGCTGCTGATAA<br>AGATTGTGAAATGAAGAGAACC | To amplify <i>snap</i> with a 5'<br>XhoI site                            |
| RF219* | GACTGGATCCAAGCTTTCCTTACCC                          | To amplify <i>snap</i> with a 3'<br>BamHI site                           |
| RF311  | TAGGGTAACAAAAAACACCG                               | Linearization of pMTL-<br>SC7315                                         |
| RF312  | CCTTTTTGATAATCTCATGACC                             | Linearization of pMTL-<br>SC7315                                         |
| RF411  | TTTTATTGCACTAGTTCCACCTG                            | Linearization of pRPF233<br>for insertion of the Tc<br>encoding sequence |
| RF412  | GATGTATTTGATACAGCTTTTACAG                          | Linearization of pRPF233<br>for insertion of the Tc<br>encoding sequence |

|        |                                                                     |                                                                                              |
|--------|---------------------------------------------------------------------|----------------------------------------------------------------------------------------------|
| RF635  | CGTAGAAATACGGTGTTTTTTGTTA<br>CCCTATCAATCTATAAATTAAATGT<br>TGTCC     | For Gibson assembly to<br>place a <i>secA2-snap</i><br>homology cassette into<br>pMTL-SC7315 |
| RF636  | ATTACATGAACTTTTTTACCCAAGT<br>CCTGGTTTC                              | For Gibson assembly to<br>place a <i>secA2-snap</i><br>homology cassette into<br>pMTL-SC7315 |
| RF637  | CCAGGACTTGGGTAAAAAAGTTCA<br>TGTAATTTTTATTAATG                       | For Gibson assembly to<br>place a <i>secA2-snap</i><br>homology cassette into<br>pMTL-SC7315 |
| RF638  | GGGATTTTGGTCATGAGATTATCA<br>AAAAGGCATATTACCTTTAACAGT<br>TAATCTATATC | For Gibson assembly to<br>place a <i>secA2-snap</i><br>homology cassette into<br>pMTL-SC7315 |
| RF721* | GTC <u>ACTCGAGG</u> TTCGTCCGCTGAA<br>TTGTATTGTTGC                   | To amplify <i>DHFR</i> with a 5'<br>XhoI site                                                |
| RF722* | GTC <u>ACTCGAGC</u> CAGATCTTCTTCGCT<br>AATC                         | To amplify <i>DHFR</i> with a 3'<br>XhoI site                                                |
| RF789  | GCAACTACTGGAACACAAG                                                 | To delete <i>slpA</i> signal<br>peptide coding sequence                                      |

|        |                                                                                          |                                                                              |
|--------|------------------------------------------------------------------------------------------|------------------------------------------------------------------------------|
| RF790  | CATTTCTTAAATTCCTCCCAAC                                                                   | To delete <i>slpA</i> signal<br>peptide coding sequence                      |
| RF811  | CCGGACTATGCAGGATCCTATCCA<br>TATGACGTTCCAGATTACGCTCCGT<br>AAGGATCCTATAAGTTTTAATAAAA<br>AC | To add the triple HA tag<br>coding sequence to <i>slpA</i> -<br><i>hDHFR</i> |
| RF812  | GACGTCATAGGGATAGCCCGCATA<br>GTCAGGAACATCGTATGGGTAAAC<br>CTCGAGCAGATCTTCTTC               | To add the triple HA tag<br>coding sequence to <i>slpA</i> -<br><i>hDHFR</i> |
| RF866* | GATCGCGGCCGCCAGATCTTCTTC<br>GCTAATCAGTTTC                                                | To linearize pPOE002,<br>adding a NotI site                                  |
| RF867  | CATCCACAATTTGAAAAATAAGGA<br>TCC                                                          | To linearize pPOE002,<br>adding a NotI site                                  |
| RF868* | GATCGCGGCCGCTGATAAAGATTG<br>TGAAATGAAGAGAACC                                             | To amplify <i>snap</i> with a 5'<br>NotI site                                |
| RF869  | GTTACTAGTGGATCCAAGCTTTC                                                                  | To amplify <i>snap</i> with a 5'<br>NotI site                                |
| RF1079 | TGCTAAGGCCGATAAAGATTGTGA<br>AATGAAGAG                                                    | To change linker in<br>pJAK067 (SecA2-SNAP in<br>pMTL-SC7315 ) to<br>AEAAKA  |



368 **Acknowledgements**

369 We would like to thank Darren Robinson and Christa Walther at The Wolfson Light  
370 Microscopy Facility at the University of Sheffield for their help with microscopy. We would  
371 also like to thank Aimee Shen for helpful discussion and Neil Fairweather for feedback on a  
372 previous version of this manuscript.

373 This work was supported by the Medical Research Council (grant number MR/N000900/1)  
374 and the Wellcome Trust (grant number 204877/Z/16/Z).

375

376 **References**

- 377 Arkowitz, R. A., Joly, J. C., & Wickner, W. (1993). Translocation can drive the unfolding of a  
378 preprotein domain. *EMBO J*, *12*(1), 243-253.
- 379 Bensing, B. A., Seepersaud, R., Yen, Y. T., & Sullam, P. M. (2014). Selective transport by  
380 SecA2: an expanding family of customized motor proteins. *Biochim Biophys Acta*, *1843*(8),  
381 1674-1686. doi:10.1016/j.bbamcr.2013.10.019
- 382 Bonardi, F., Halza, E., Walko, M., Du Plessis, F., Nouwen, N., Feringa, B. L., & Driessen, A.  
383 J. (2011). Probing the SecYEG translocation pore size with preproteins conjugated with sizable  
384 rigid spherical molecules. *Proc Natl Acad Sci U S A*, *108*(19), 7775-7780.  
385 doi:10.1073/pnas.1101705108
- 386 Calabi, E., Ward, S., Wren, B., Paxton, T., Panico, M., Morris, H., . . . Fairweather, N. (2001).  
387 Molecular characterization of the surface layer proteins from *Clostridium difficile*. *Mol*  
388 *Microbiol*, *40*(5), 1187-1199.
- 389 Cartman, S. T., Kelly, M. L., Heeg, D., Heap, J. T., & Minton, N. P. (2012). Precise  
390 manipulation of the *Clostridium difficile* chromosome reveals a lack of association between the  
391 *tcdC* genotype and toxin production. *Appl Environ Microbiol*, *78*(13), 4683-4690.  
392 doi:10.1128/AEM.00249-12
- 393 Colavin, A., Shi, H., & Huang, K. C. (2018). RodZ modulates geometric localization of the  
394 bacterial actin MreB to regulate cell shape. *Nat Commun*, *9*(1), 1280. doi:10.1038/s41467-018-  
395 03633-x
- 396 de la Riva, L., Willing, S. E., Tate, E. W., & Fairweather, N. F. (2011). Roles of cysteine  
397 proteases Cwp84 and Cwp13 in biogenesis of the cell wall of *Clostridium difficile*. *J Bacteriol*,  
398 *193*(13), 3276-3285. doi:10.1128/JB.00248-11



- 399 Dembek, M., Barquist, L., Boinett, C. J., Cain, A. K., Mayho, M., Lawley, T. D., . . . Fagan,  
400 R. P. (2015). High-throughput analysis of gene essentiality and sporulation in *Clostridium*  
401 *difficile*. *MBio*, 6(2), e02383. doi:10.1128/mBio.02383-14
- 402 Eilers, M., & Schatz, G. (1986). Binding of a specific ligand inhibits import of a purified  
403 precursor protein into mitochondria. *Nature*, 322(6076), 228-232. doi:10.1038/322228a0
- 404 Fagan, R. P., Albesa-Jove, D., Qazi, O., Svergun, D. I., Brown, K. A., & Fairweather, N. F.  
405 (2009). Structural insights into the molecular organization of the S-layer from *Clostridium*  
406 *difficile*. *Mol Microbiol*, 71(5), 1308-1322. doi:10.1111/j.1365-2958.2009.06603.x
- 407 Fagan, R. P., & Fairweather, N. F. (2011). *Clostridium difficile* has two parallel and essential  
408 Sec secretion systems. *J Biol Chem*, 286(31), 27483-27493. doi:10.1074/jbc.M111.263889
- 409 Fagan, R. P., & Fairweather, N. F. (2014). Biogenesis and functions of bacterial S-layers. *Nat*  
410 *Rev Microbiol*, 12(3), 211-222. doi:10.1038/nrmicro3213
- 411 Fagan, R. P., Janoir, C., Collignon, A., Mastrantonio, P., Poxton, I. R., & Fairweather, N. F.  
412 (2011). A proposed nomenclature for cell wall proteins of *Clostridium difficile*. *J Med*  
413 *Microbiol*, 60(Pt 8), 1225-1228. doi:10.1099/jmm.0.028472-0
- 414 Greaves, N. S., Ashcroft, K. J., Baguneid, M., & Bayat, A. (2013). Current understanding of  
415 molecular and cellular mechanisms in fibroplasia and angiogenesis during acute wound  
416 healing. *J Dermatol Sci*, 72(3), 206-217. doi:10.1016/j.jdermsci.2013.07.008
- 417 Hull, M. W., & Beck, P. L. (2004). *Clostridium difficile*-associated colitis. *Can Fam Physician*,  
418 50, 1536-1540, 1543-1535.
- 419 Kim, J., & Kendall, D. A. (2000). Sec-dependent protein export and the involvement of the  
420 molecular chaperone SecB. *Cell Stress Chaperones*, 5(4), 267-275.
- 421 Kirby, J. M., Ahern, H., Roberts, A. K., Kumar, V., Freeman, Z., Acharya, K. R., & Shone, C.  
422 C. (2009). Cwp84, a surface-associated cysteine protease, plays a role in the maturation of the

- 423 surface layer of *Clostridium difficile*. *J Biol Chem*, 284(50), 34666-34673.  
424 doi:10.1074/jbc.M109.051177
- 425 Kirk, J. A., & Fagan, R. P. (2016). Heat shock increases conjugation efficiency in *Clostridium*  
426 *difficile*. *Anaerobe*, 42, 1-5. doi:10.1016/j.anaerobe.2016.06.009
- 427 Kirk, J. A., Gebhart, D., Buckley, A. M., Lok, S., Scholl, D., Douce, G. R., . . . Fagan, R. P.  
428 (2017). New class of precision antimicrobials redefines role of *Clostridium difficile* S-layer in  
429 virulence and viability. *Sci Transl Med*, 9(406). doi:10.1126/scitranslmed.aah6813
- 430 Kuru, E., Hughes, H. V., Brown, P. J., Hall, E., Tekkam, S., Cava, F., . . . VanNieuwenhze, M.  
431 S. (2012). In Situ probing of newly synthesized peptidoglycan in live bacteria with fluorescent  
432 D-amino acids. *Angew Chem Int Ed Engl*, 51(50), 12519-12523. doi:10.1002/anie.201206749
- 433 Mayer, M. J., Garefalaki, V., Spoerl, R., Narbad, A., & Meijers, R. (2011). Structure-based  
434 modification of a *Clostridium difficile*-targeting endolysin affects activity and host range. *J*  
435 *Bacteriol*, 193(19), 5477-5486. doi:10.1128/JB.00439-11
- 436 McNeil, P. L., & Baker, M. M. (2001). Cell surface events during resealing visualized by  
437 scanning-electron microscopy. *Cell Tissue Res*, 304(1), 141-146.
- 438 Mescher, M. F., & Strominger, J. L. (1976). Structural (shape-maintaining) role of the cell  
439 surface glycoprotein of *Halobacterium salinarium*. *Proc Natl Acad Sci U S A*, 73(8), 2687-  
440 2691.
- 441 Monot, M., Boursaux-Eude, C., Thibonnier, M., Vallenet, D., Moszer, I., Medigue, C., . . .  
442 Dupuy, B. (2011). Reannotation of the genome sequence of *Clostridium difficile* strain 630. *J*  
443 *Med Microbiol*, 60(Pt 8), 1193-1199. doi:10.1099/jmm.0.030452-0
- 444 Napolitano, L. M., & Edmiston, C. E., Jr. (2017). *Clostridium difficile* disease: Diagnosis,  
445 pathogenesis, and treatment update. *Surgery*, 162(2), 325-348. doi:10.1016/j.surg.2017.01.018

446 Pereira, F. C., Saujet, L., Tome, A. R., Serrano, M., Monot, M., Couture-Tosi, E., . . .  
447 Henriques, A. O. (2013). The spore differentiation pathway in the enteric pathogen *Clostridium*  
448 *difficile*. *PLoS Genet*, *9*(10), e1003782. doi:10.1371/journal.pgen.1003782  
449 Purdy, D., O'Keeffe, T. A., Elmore, M., Herbert, M., McLeod, A., Bokori-Brown, M., . . .  
450 Minton, N. P. (2002). Conjugative transfer of clostridial shuttle vectors from *Escherichia coli*  
451 to *Clostridium difficile* through circumvention of the restriction barrier. *Mol Microbiol*, *46*(2),  
452 439-452.  
453 Ransom, E. M., Ellermeier, C. D., & Weiss, D. S. (2015). Use of mCherry Red fluorescent  
454 protein for studies of protein localization and gene expression in *Clostridium difficile*. *Appl*  
455 *Environ Microbiol*, *81*(5), 1652-1660. doi:10.1128/AEM.03446-14  
456 Rassow, J., Guiard, B., Wienhues, U., Herzog, V., Hartl, F. U., & Neupert, W. (1989).  
457 Translocation arrest by reversible folding of a precursor protein imported into mitochondria. A  
458 means to quantitate translocation contact sites. *J Cell Biol*, *109*(4 Pt 1), 1421-1428.  
459 Sebahia, M., Wren, B. W., Mullany, P., Fairweather, N. F., Minton, N., Stabler, R., . . .  
460 Parkhill, J. (2006). The multidrug-resistant human pathogen *Clostridium difficile* has a highly  
461 mobile, mosaic genome. *Nat Genet*, *38*(7), 779-786. doi:10.1038/ng1830  
462 Stabler, R. A., He, M., Dawson, L., Martin, M., Valiente, E., Corton, C., . . . Wren, B. W.  
463 (2009). Comparative genome and phenotypic analysis of *Clostridium difficile* 027 strains  
464 provides insight into the evolution of a hypervirulent bacterium. *Genome Biol*, *10*(9), R102.  
465 doi:10.1186/gb-2009-10-9-r102  
466 Takumi, K., Koga, T., Oka, T., & Endo, Y. (1991). Self-Assembly, Adhesion, And Chemical  
467 Properties Of Tetragonally Arrayed S-Layer Proteins Of *Clostridium*. *The Journal of General*  
468 *and Applied Microbiology*, *37*(6), 455-465. doi:10.2323/jgam.37.455

469 Tang, S. K. Y., & Marshall, W. F. (2017). Self-repairing cells: How single cells heal membrane  
470 ruptures and restore lost structures. *Science*, 356(6342), 1022-1025.  
471 doi:10.1126/science.aam6496

472 Willing, S. E., Candela, T., Shaw, H. A., Seager, Z., Mesnage, S., Fagan, R. P., & Fairweather,  
473 N. F. (2015). *Clostridium difficile* surface proteins are anchored to the cell wall using CWB2  
474 motifs that recognise the anionic polymer PSII. *Mol Microbiol*, 96(3), 596-608.  
475 doi:10.1111/mmi.12958

476

477 **Supplemental Figure Legends**

478 **Figure 2-figure supplement 1: *C. difficile* 630 HADA staining chase time course**

479 **A:** Widefield microscopy displaying phase contrast (upper panels) and fluorescence (lower  
480 panels) of HADA stained *C. difficile* 630 cells chased for 0, 10, 20 or 30 min without HADA  
481 (as described in Methods). HADA staining at the center of a dividing cell can be characterized  
482 as: septum stained (left) or patches of reduced HADA staining being smaller than 360 nm in  
483 length (middle) or larger (right). Scale bar indicates 3  $\mu$ m.

484 **B:** Graph displaying the population distribution of dividing *C. difficile* 630 cells characterized  
485 for HADA staining in widefield microscopy (as in Figure 2S1A) when chased for HADA for  
486 0, 10, 20 or 30 minutes (T0, n=56; T10, n=62; T20, n=71; T30, n=107). The percentage of the  
487 total counted population are displayed above each bar.

488

489 **Figure 2-figure supplement 2: Antibody specificity for SlpAR<sub>20291</sub> LMW-SLP.**

490 **A:** Top panel: Coomassie stain of SDS-PAGE separated extracellular extracts from *C. difficile*  
491 630 cells grown for three hours with the indicated amount of anhydrotetracycline (Atc) to  
492 induce protein expression. Lower panel: Western immunoblot to detect SlpAR<sub>20291</sub> LMW-SLP  
493 in the same extracellular extracts.

494 **B:** Widefield microscopy of *C. difficile* 630 cells with pRPF238 (encoding SlpAR<sub>20291</sub>::LMW-  
495 Tetracysteine. The tetracysteine tag was used during other labelling experiments that were  
496 unsuccessful (data not shown)) induced (bottom panels) or not induced (top panels) with 100  
497 ng/ml Atc for 5 minutes. Surface SlpAR<sub>20291</sub> was immunolabeled with Cy5 (magenta). Scale  
498 bar indicates 6  $\mu$ m.

499

500 **Figure 2-figure supplement 3: Further images of new surface S-layer**

501 Representative examples of airyscan confocal images displaying *C. difficile* 630 cells prepared  
502 as in Figure 2 with HADA label peptidoglycan cell wall (Blue), new SlpA<sub>R20291</sub> immunolabeled  
503 with Cy5 (White) and yellow bar regions used for intensity plot graphs. Intensity plot graphs  
504 display HADA (Blue) and Cy5 (Grey) signal with upper and lower graphs corresponding to  
505 the higher and lower cell region marked with yellow bars in the left panels, respectively.

506

507 **Figure 4-figure supplement 1: SecA2-SNAP is functional in *C. difficile*.**

508 **A:** Western immunoblot showing the distribution of SecA2 in extracellular (E), cytosolic (C)  
509 and membrane (M) fractions from wild-type *C. difficile* 630 or cells expressing a genomic copy  
510 of a *secA2-SNAP* fusion, loaded at the same OD<sub>600</sub>U.

511 **B:** In-gel fluorescence of SecA2-SNAP-TMR-Star from cell extracts expressing SecA2-SNAP  
512 (labelled as in A).

513 **C:** Growth curves of wild-type *C. difficile* 630 (wt) or 630 *secA2-SNAP*. Following inoculation  
514 at an OD<sub>600</sub> of 0.05, growth was followed by measuring OD<sub>600</sub> hourly. Shown are the mean and  
515 standard error of duplicate cultures.

516

517 **Figure 5-figure supplement 1: SlpA-SNAP, SlpA-DHFR-SNAP, SlpA-DHFR expression**  
518 **and localization**

519 **A:** SDS PAGE in-gel fluorescence displaying SNAP-TMR-Star signal (left) or SNAP-Surface  
520 549 (right) from extracellular (E) or cellular (C) *C. difficile* 630 extracts expressing SlpA-  
521 SNAP or SlpA-DHFR-SNAP.

522 **B:** SDS PAGE analysis of extracellular extracts stained with coomassie (upper panel) or  
523 membrane fractions analyzed by Western immunoblot with an anti-strep-tag antibody (lower  
524 panel) from *C. difficile* 630 cells expressing strep tagged full length SlpA-DHFR or SlpA-  
525 DHFR lacking a signal sequence ( $\Delta$ SS). Protein expression was induced with 20 ng/ml Atc for  
526 180 min as indicated.

527

### 528 **Figure 5-figure supplement 2: Characterization of a SlpA-DHFR fusion protein**

529 **A:** Western immunoblot analysis of *C. difficile* R20291 expressing an SlpA-DHFR-3xHA  
530 fusion. Protein expression was induced (+) with 20 ng/ml Atc for 1 hour and intracellular cell  
531 extracts (membrane and cytosol) were analyzed by SDS PAGE followed by Western  
532 immunoblot using an anti-HA antibody to show expression of SlpA-DHFR-3xHA (top panel),  
533 anti-SlpA<sub>R20291</sub> to visualize accumulation of native SlpA precursor in the cytosol (middle panel)  
534 and anti-AtpB as a membrane protein and loading control (bottom panel). Samples from  
535 triplicate cultures are shown.

536 **B:** Quantification of average fold change of intracellular SlpA<sub>R20291</sub> precursor band intensity  
537 from A. Native SlpA<sub>R20291</sub> secretion is blocked by expression of SlpA-DHFR-3xHA. Asterisk  
538 indicates a significant difference ( $p \leq 0.05$ ).

539

### 540 **Figure 5-figure supplement 3: SNAP-Surface 549 Stained HMW-SlpA-SNAP**

541 **A:** Airyscan confocal images of *C. difficile* 630 cells stained with SNAP-Surface 549 and  
542 induced or not induced for SlpA-SNAP expression. Surface 549 signal (left panels), green  
543 autofluorescence from *C. difficile* 630 cells (middle panels) and merged (right panels). Area  
544 taken for zoomed image depicted by a yellow square. Scale bar indicates 6  $\mu$ m.

545 **B:** Zoomed area (from **A**) of HMW-SlpA-SNAP-Surface 549 signal (left panel) and  
546 autofluorescence merged image (right panel). Scale bar indicates 6  $\mu\text{m}$ .

547

548 **Video 1: Live-cell imaging of *C. difficile* HADA Chase**

549 Live-cell widefield microscopy of HADA fluorescent signal (top panel) and phase contrast  
550 (bottom panel) from *C. difficile* 630 cells chased for HADA staining, with a cell undergoing the  
551 final stages of cell division. 22 frames at  $\sim 3$  minutes per frame, scale bar indicates 3  $\mu\text{m}$ .



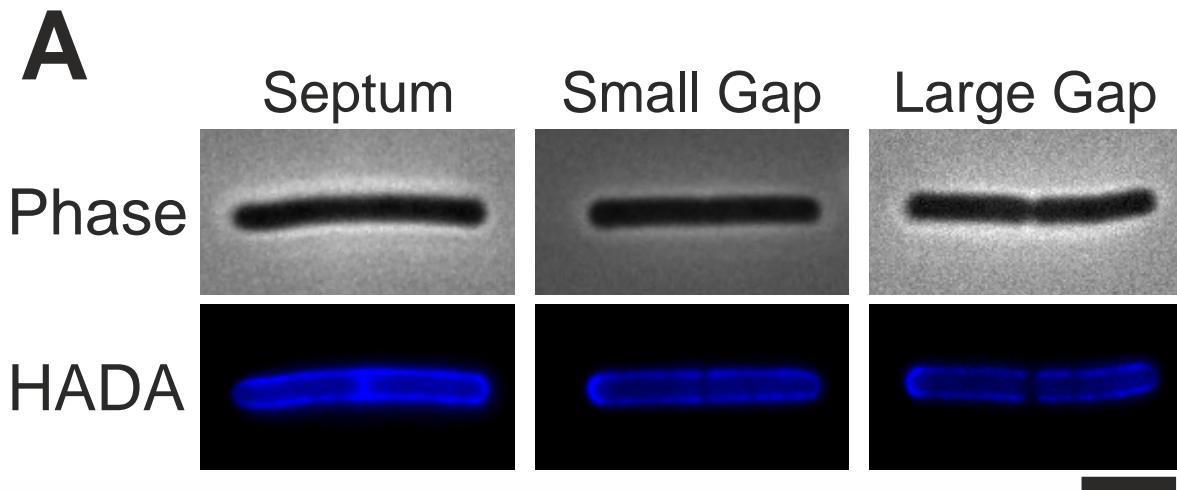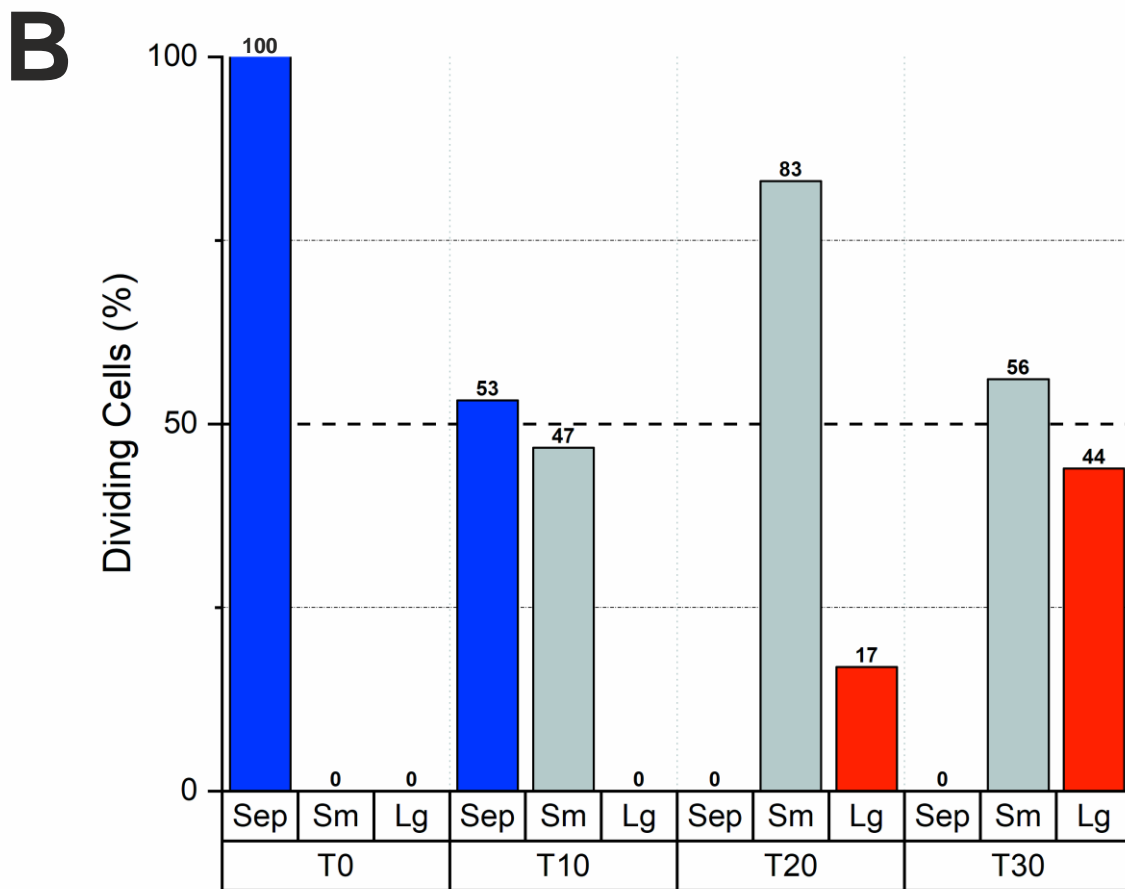

Figure 2-figure supplement 1

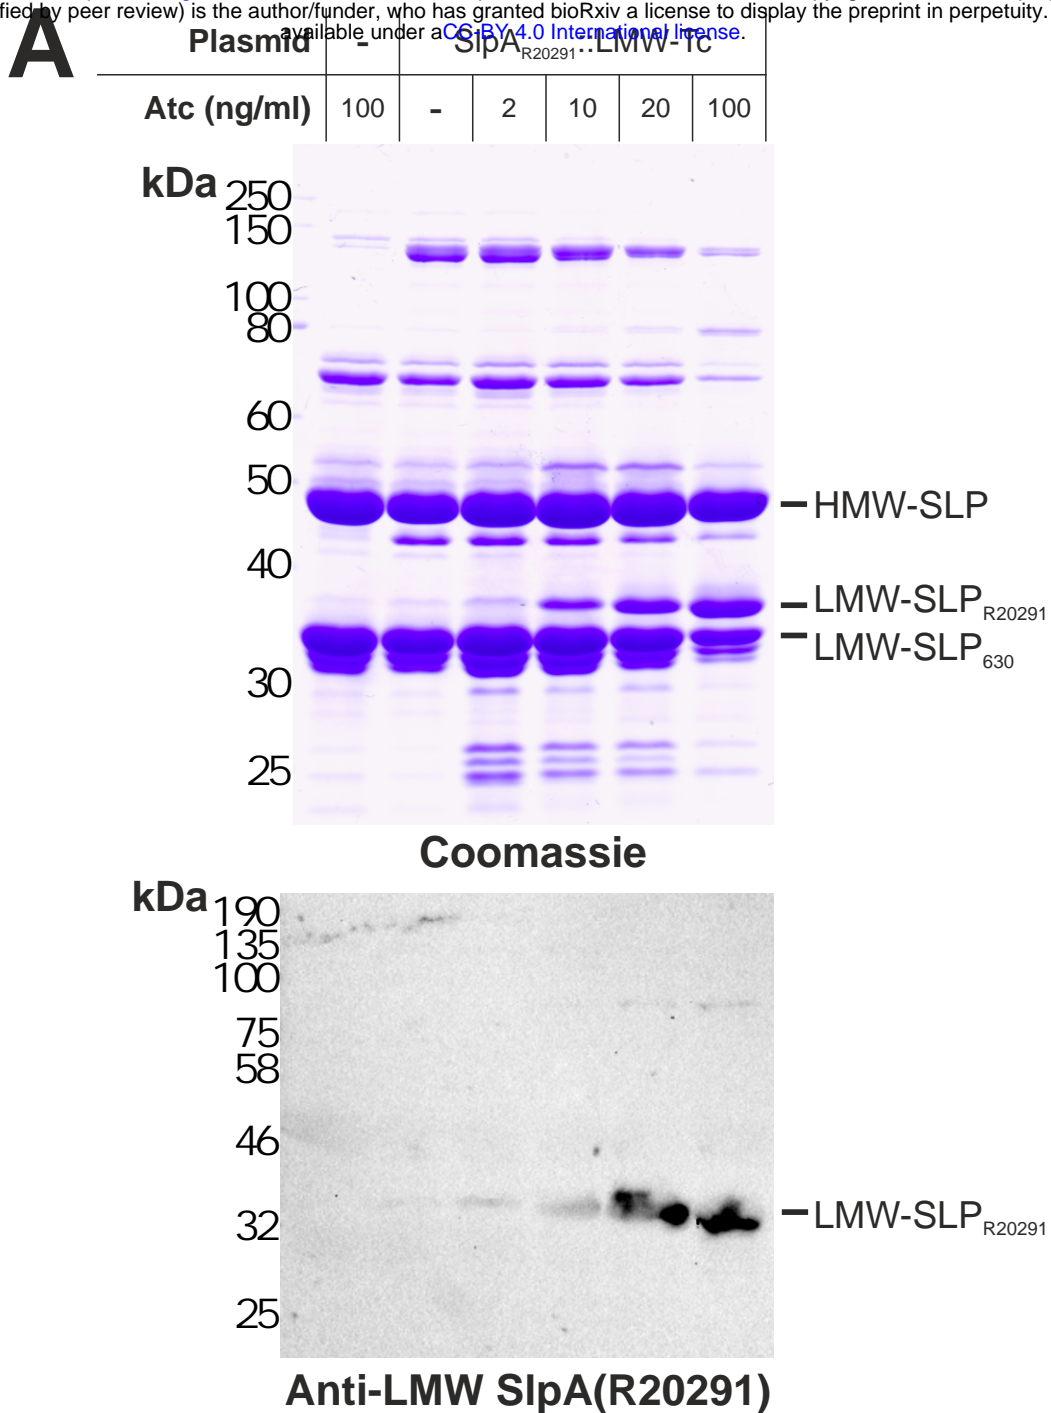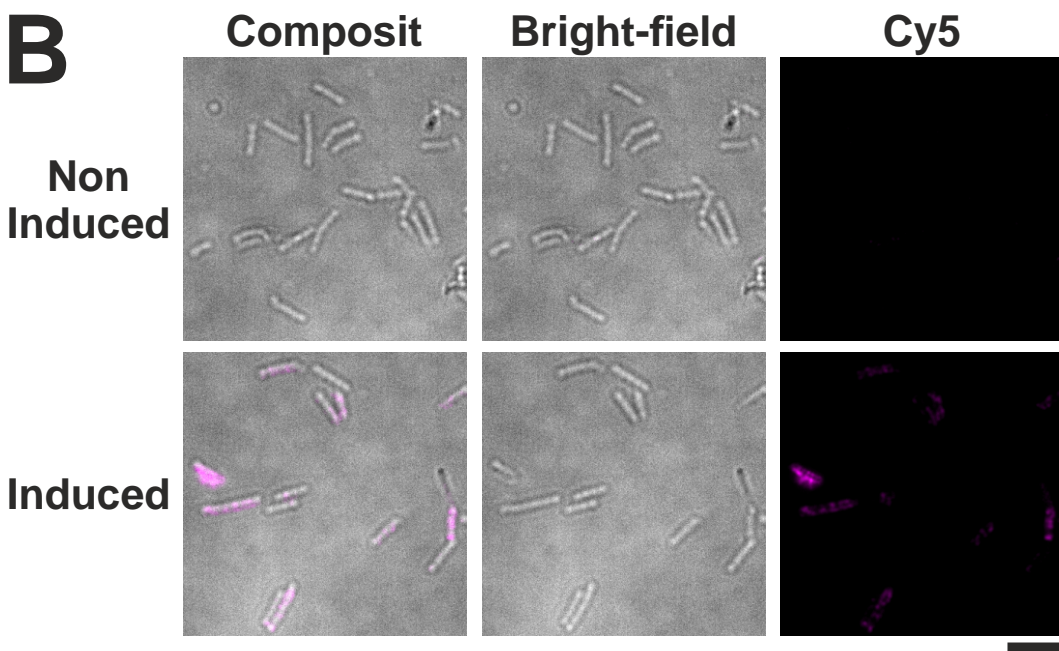

Figure 2-figure supplement 2

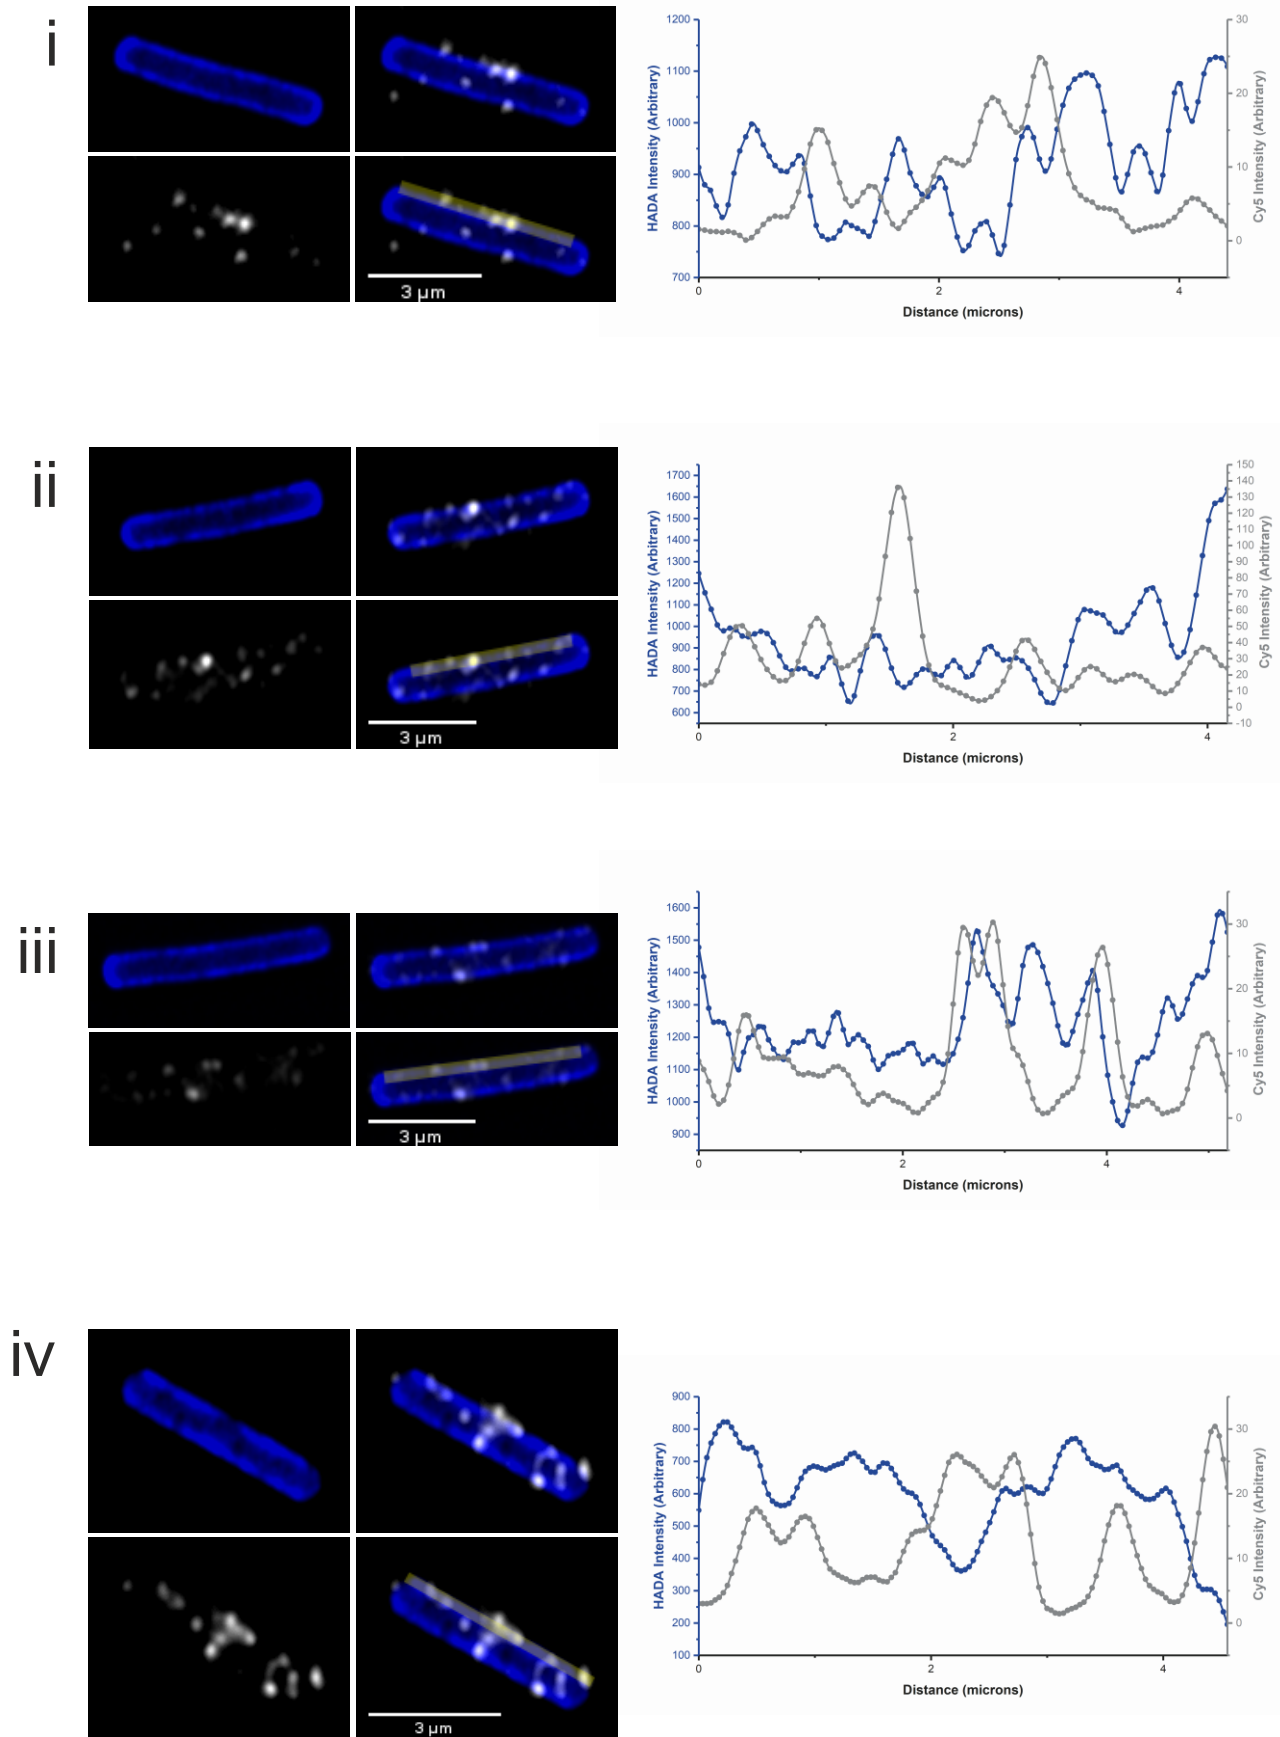

Figure 2-figure supplement 3a

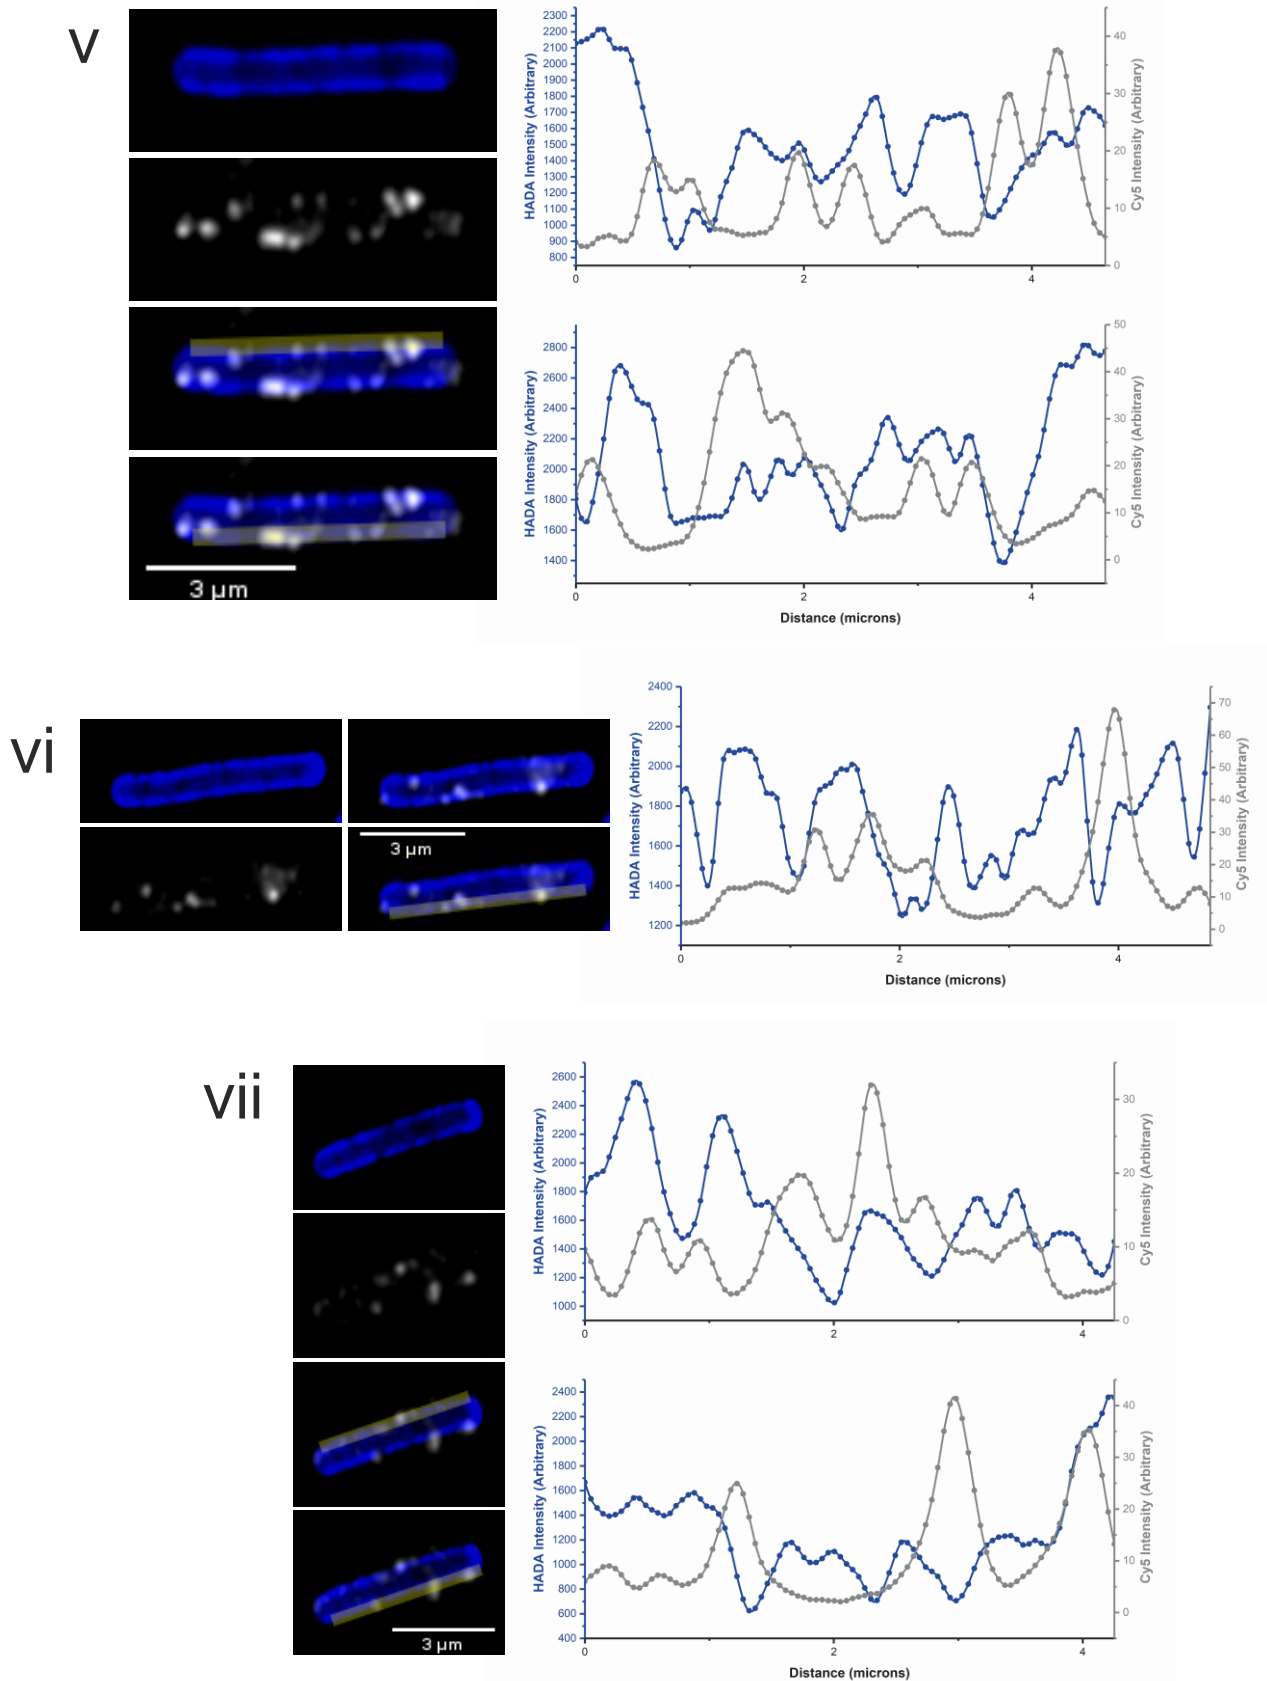

Figure 2-figure supplement 3b

viii

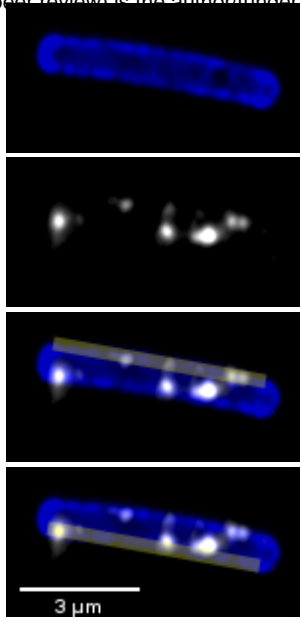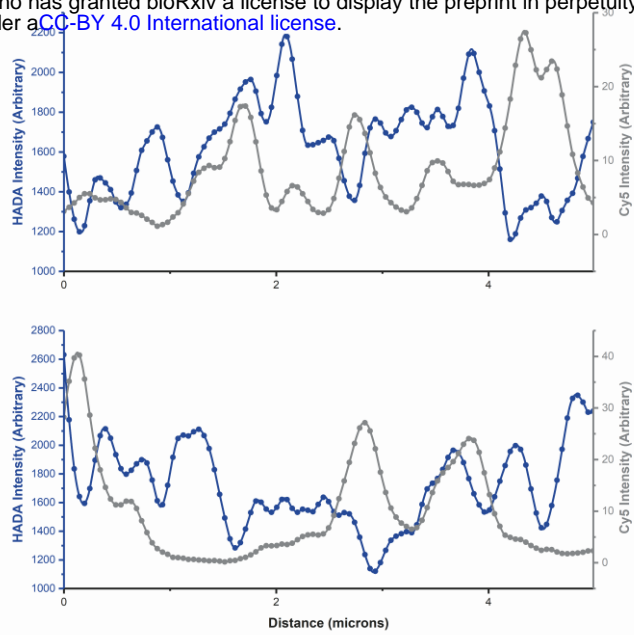

ix

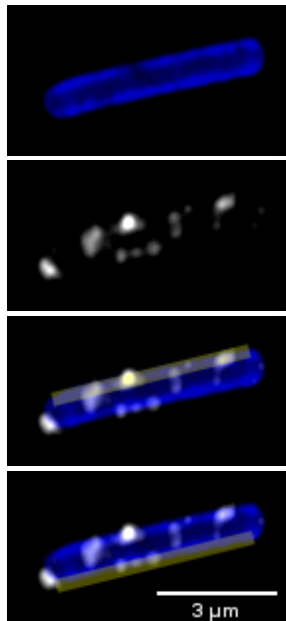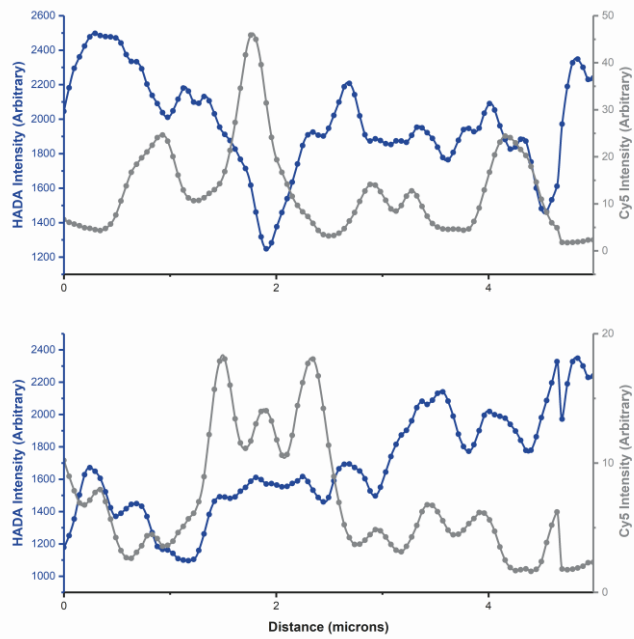

X

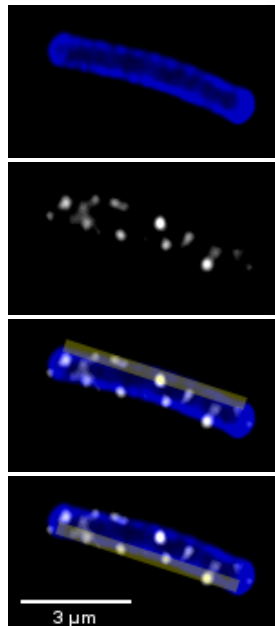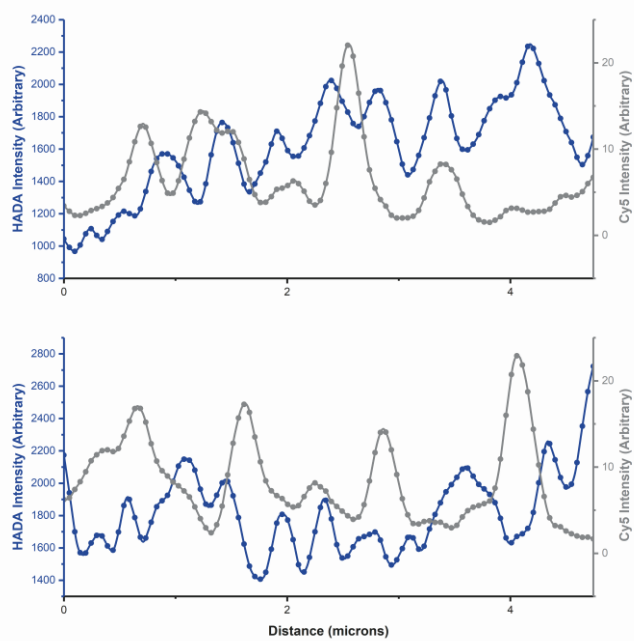

Figure 2-figure supplement 3c

Xi

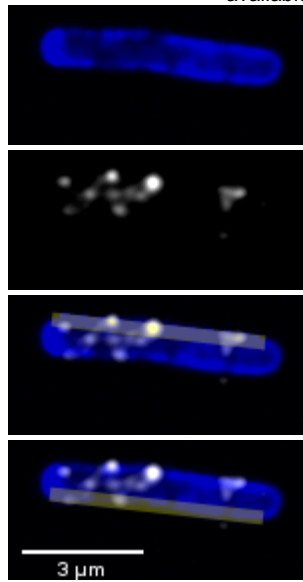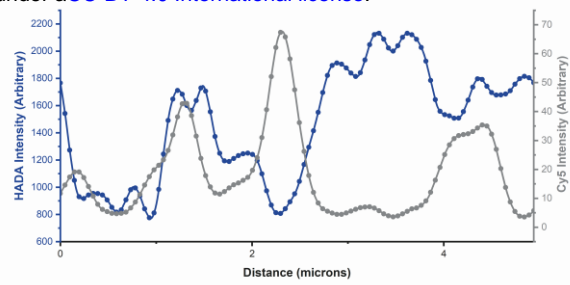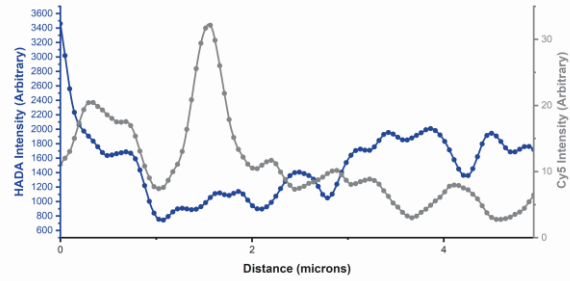

Xii

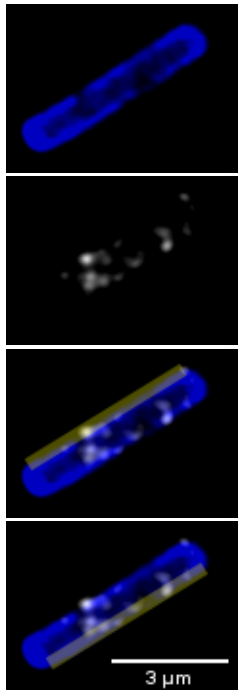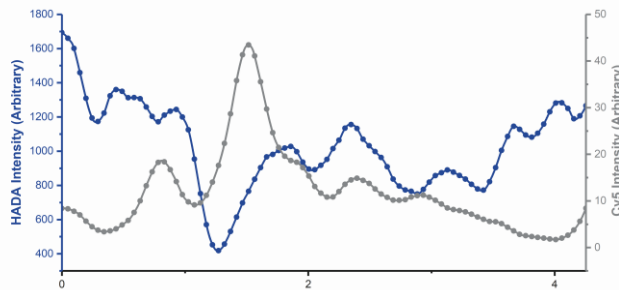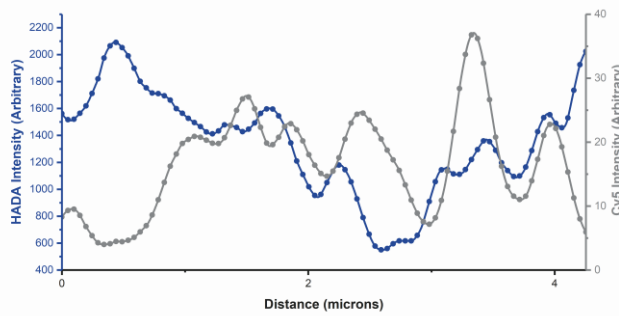

Xiii

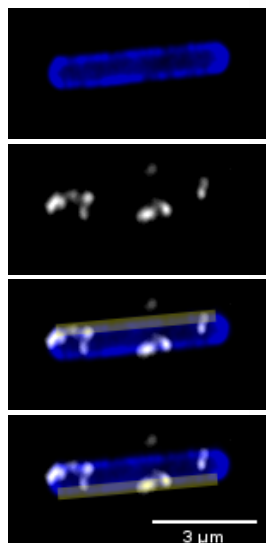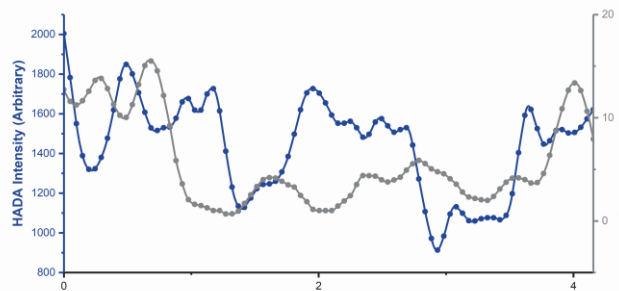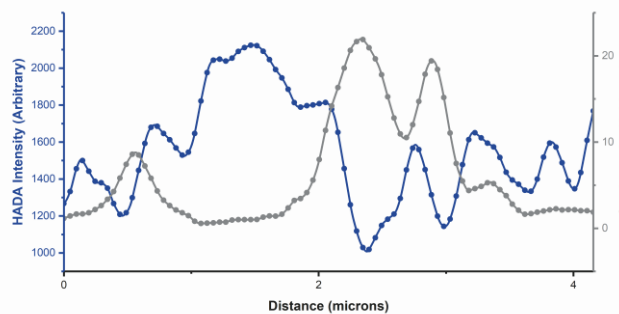

Figure 2-figure supplement 3d

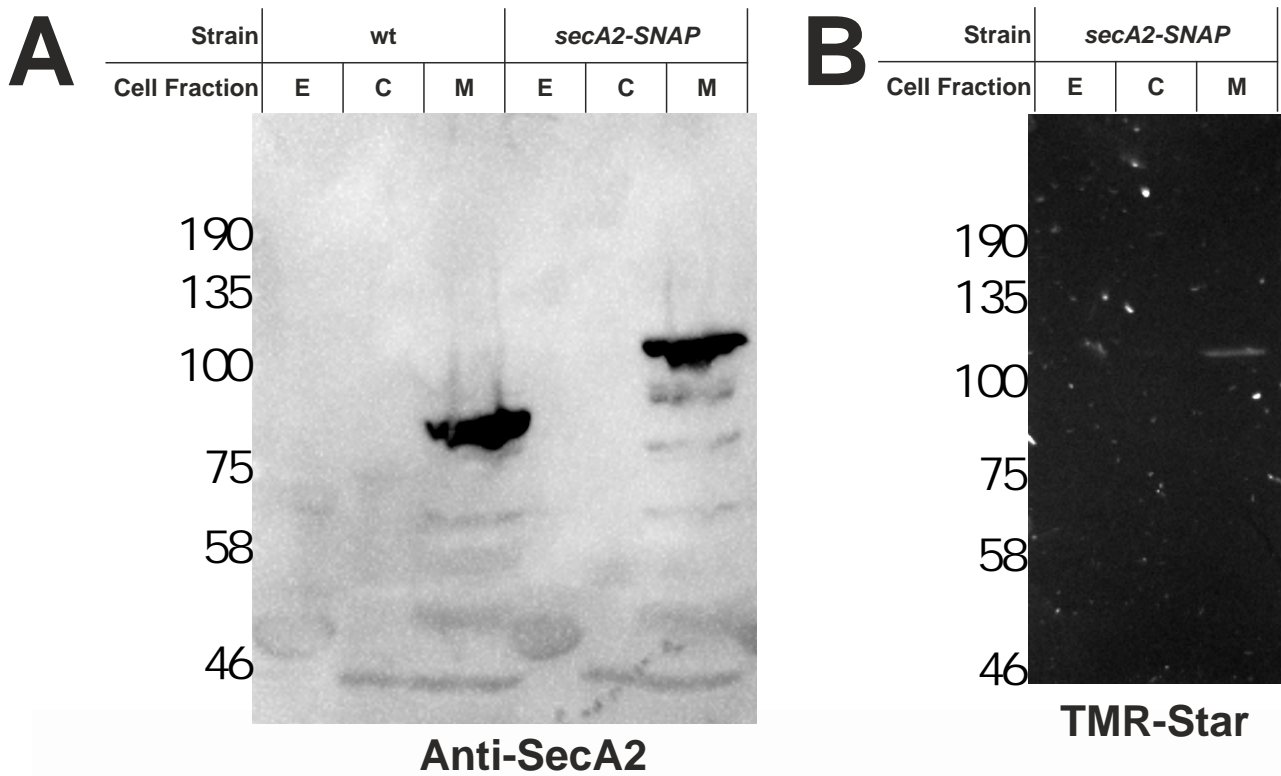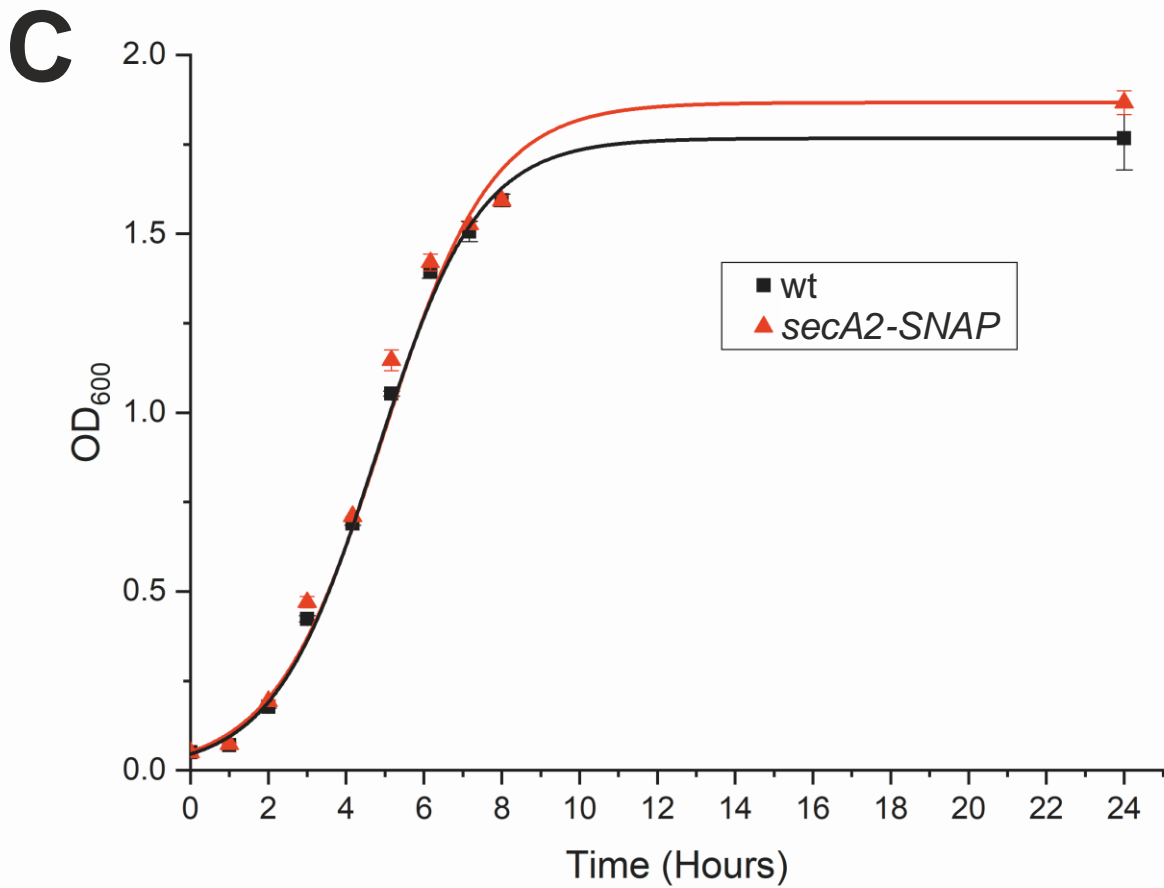

Figure 4-figure supplement 1



**A**

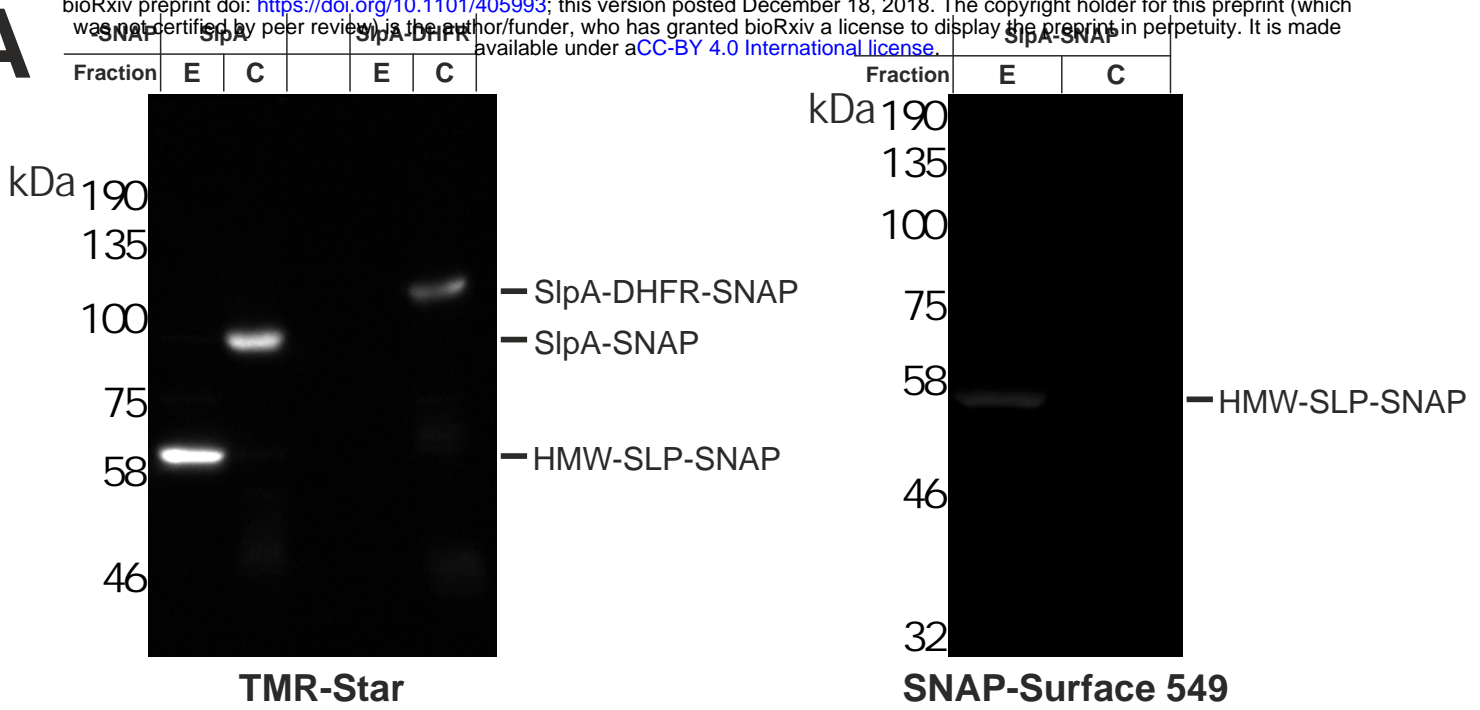

**B**

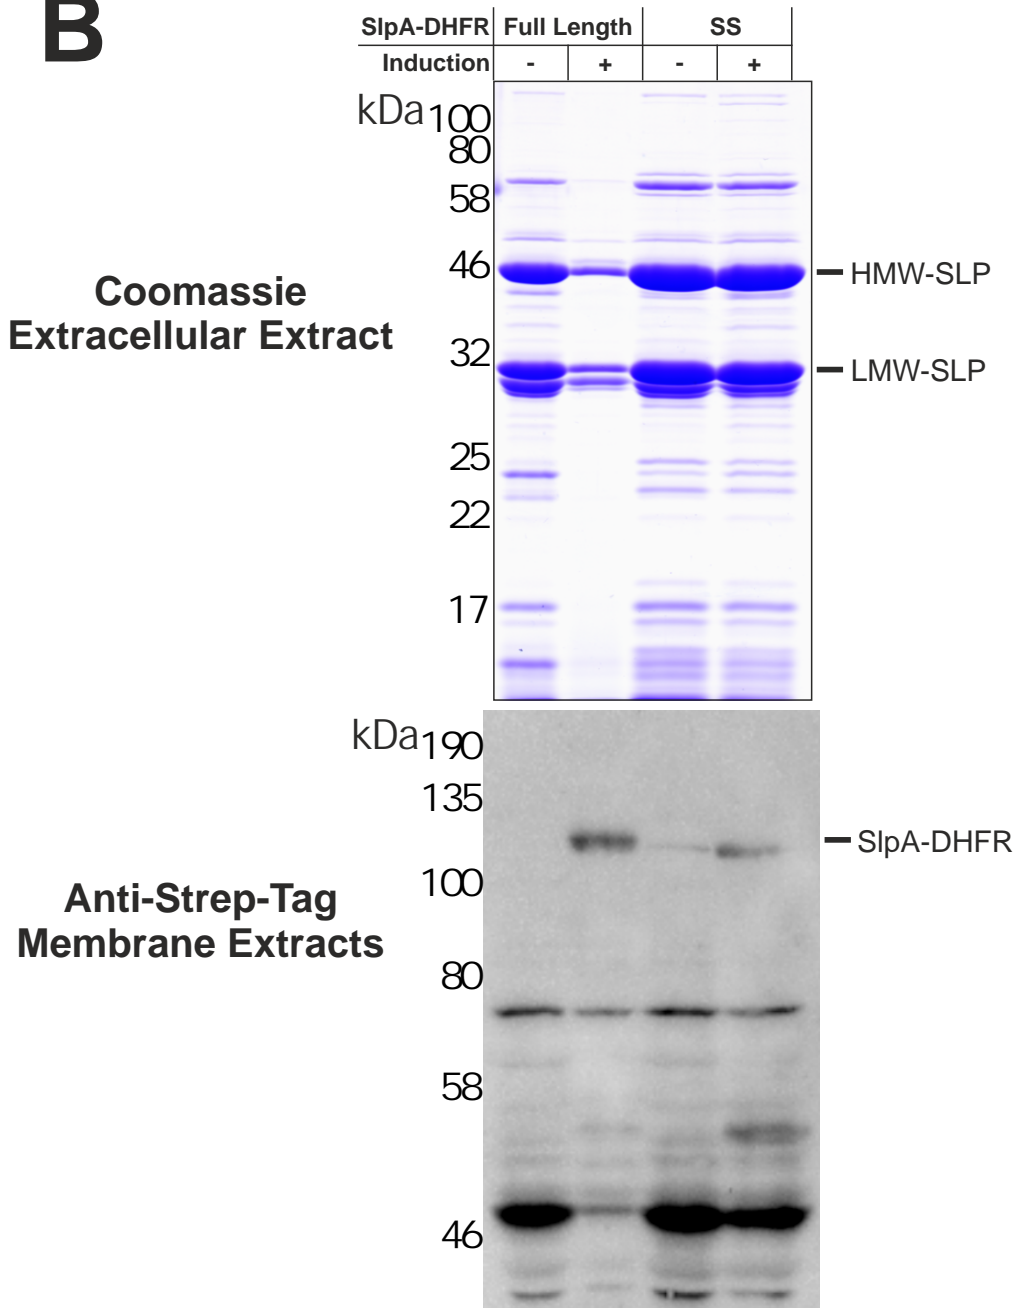

Figure 5-figure supplement 1



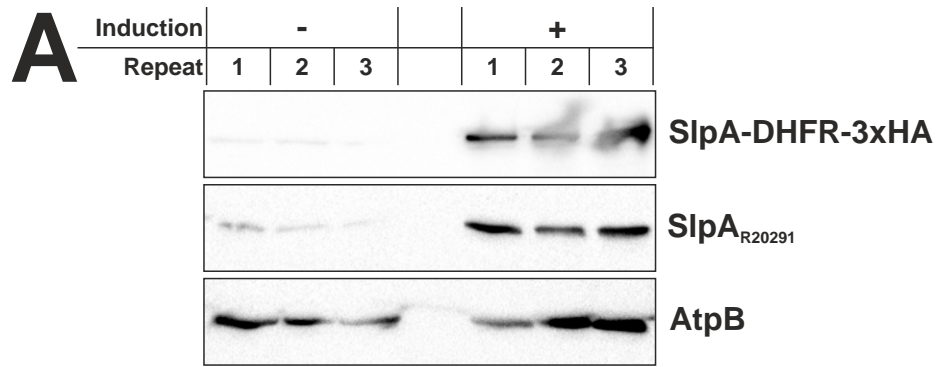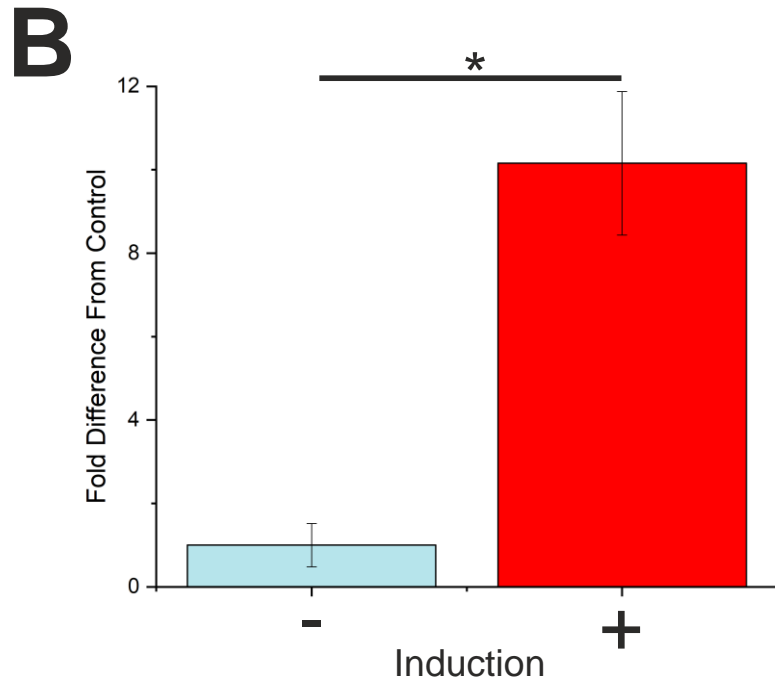

Figure 5-figure supplement 2

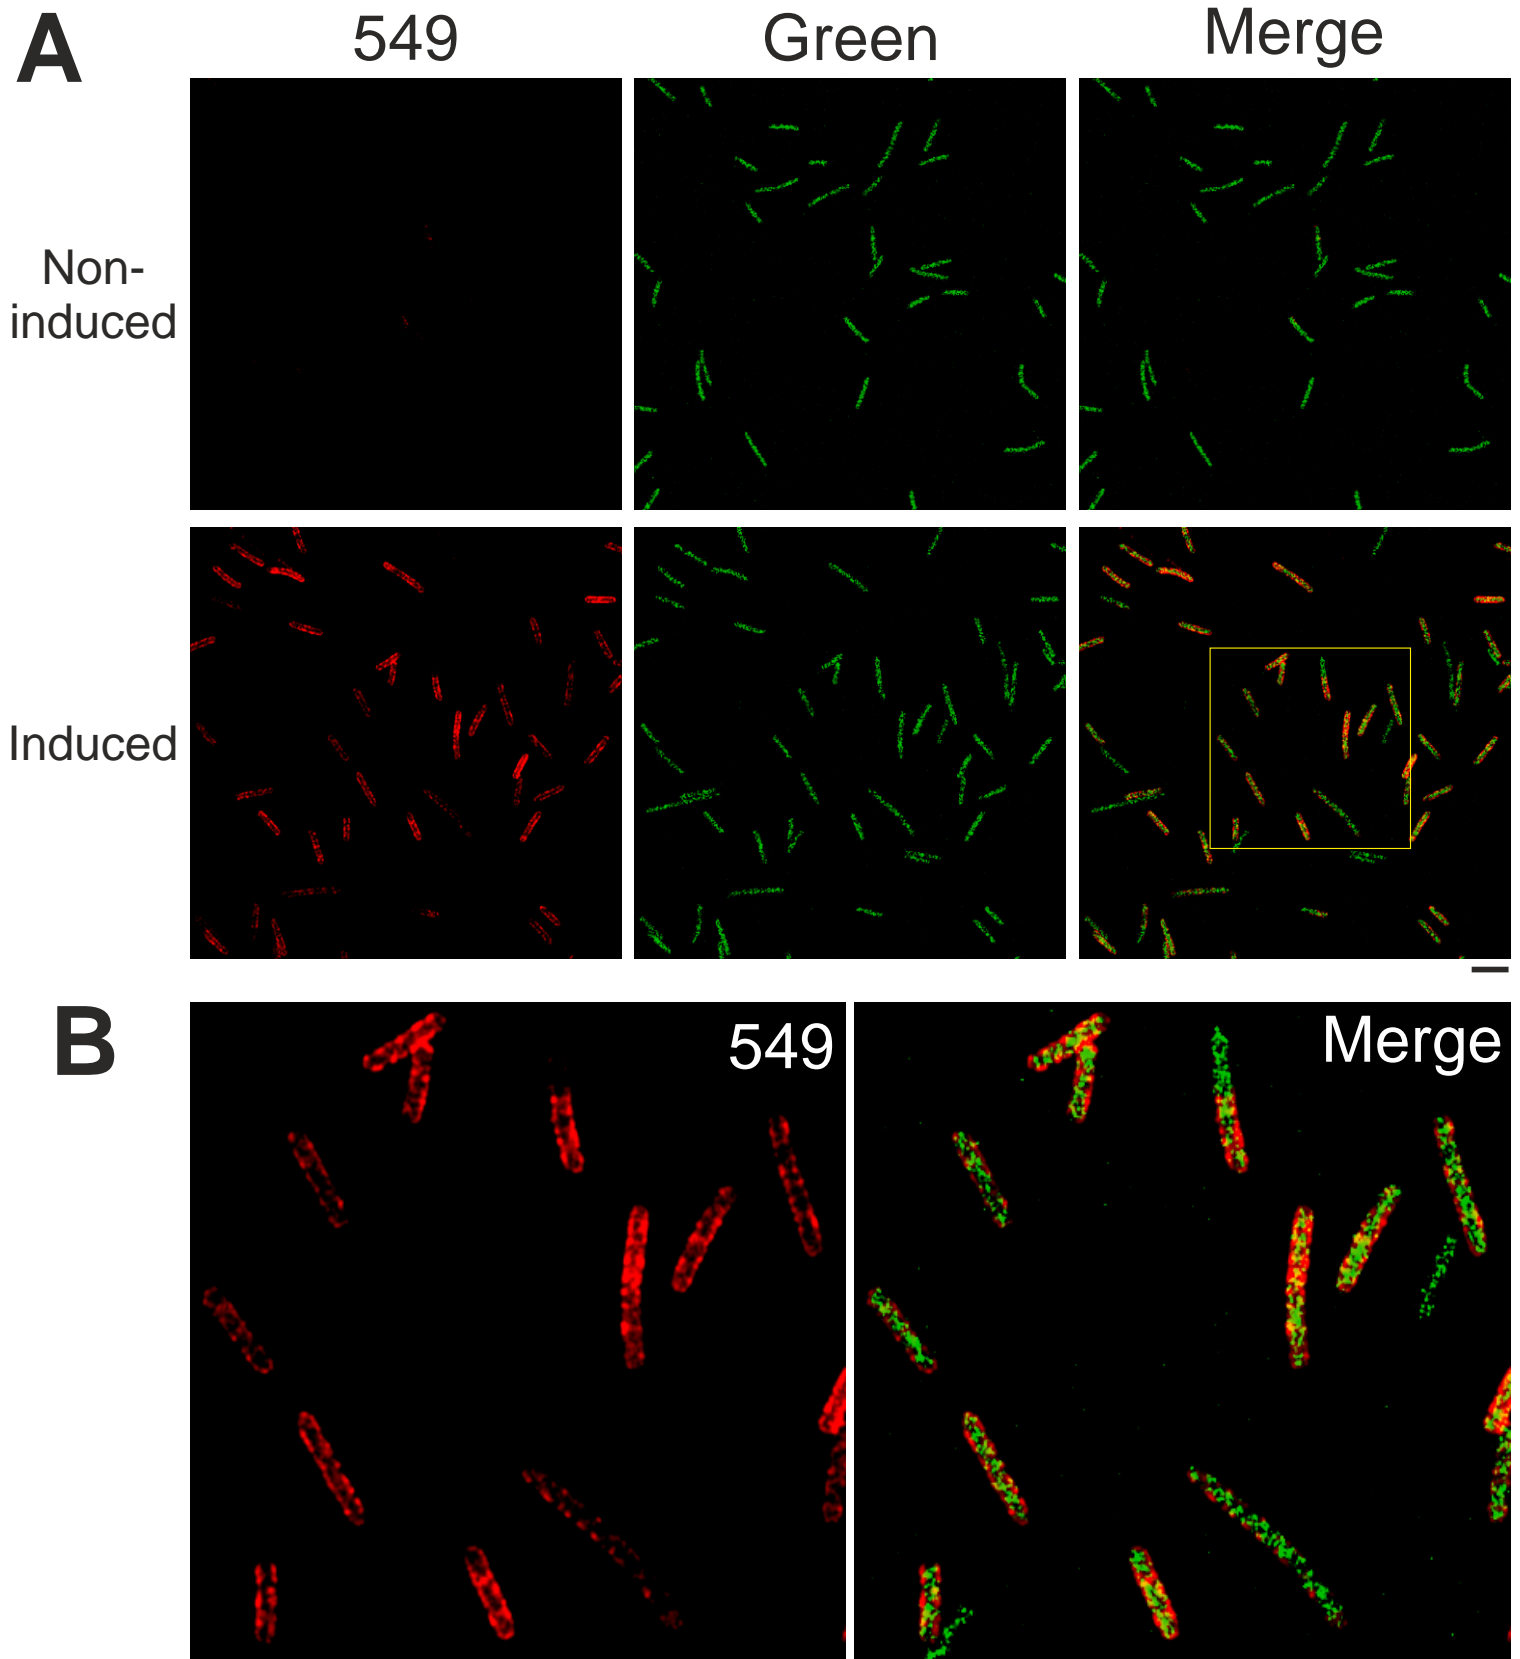

Figure 5-figure supplement 3
